# Supplementary material for: Single-Cell Gene Expression Analysis Revealed Immune Cell Signatures of Delta COVID-19
Source: MDPI journal article supplement (doi:10.3390/cells11192950), 2022-09-21
Supplement: s1 [file s1]

## Supplementary Materials: Single-cell gene expression analysis revealed immune cell signatures of Delta COVID-19

Abusaid M. Shaymardanov<sup>1,†</sup>, Olga A. Antonova<sup>1,†</sup>, Anastasia D. Sokol<sup>1</sup>, Kseniia A. Deinichenko<sup>1</sup>, Polina G. Kazakova<sup>1</sup>, Mikhail M. Milovanov<sup>1</sup>, Alexander V. Zakubansky<sup>1</sup>, Alexandra I. Akinshina<sup>1</sup>, Anastasia V. Tsyapkina<sup>1</sup>, Svetlana V. Romanova<sup>1</sup>, Vladimir E. Muhin<sup>1</sup>, Sergey I. Mitrofanov<sup>1</sup>, Vladimir S. Yudin<sup>1</sup>, Sergey M. Yudin<sup>1</sup>, Antonida V. Makhotenko<sup>1</sup>, Anton A. Keskinov<sup>1</sup>, Sergey A. Kraevoy<sup>1</sup>, Ekaterina A. Snigir<sup>1</sup>, Dmitry V. Svetlichnyy<sup>1,‡\*</sup>, Veronika I. Skvortsova<sup>2</sup>

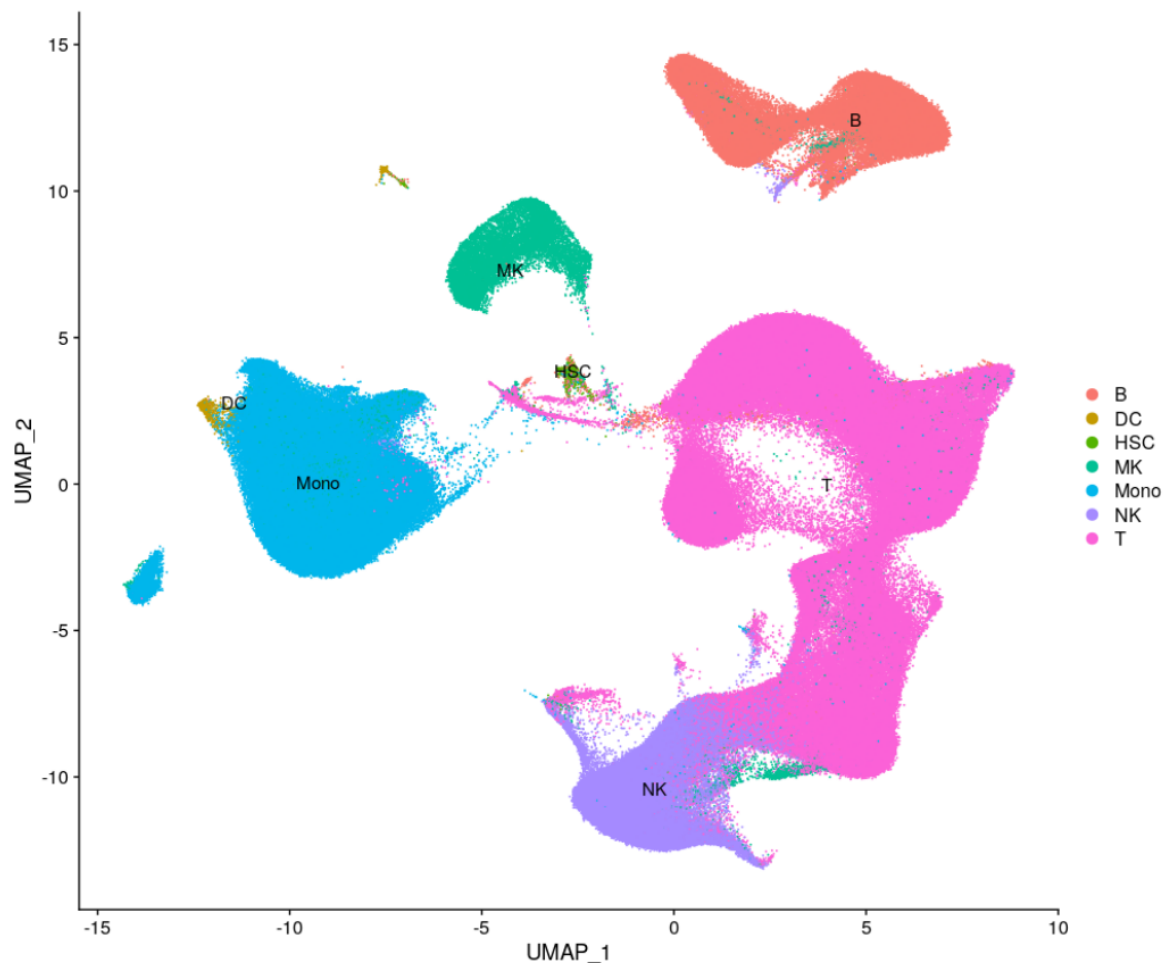

**Figure S1.** UMAP coloured by predicted celltype using Symphony computational approach. The UMAP plot demonstrates concordance with manual annotation. We applied label transfer from a dataset based on annotated 10X PBMC scRNA-seq (REF). Clear separation of the clusters show colocalisation of the main cell types (B-cells, Monocytes, T-cells, NK, megakaryocytes, DCs)

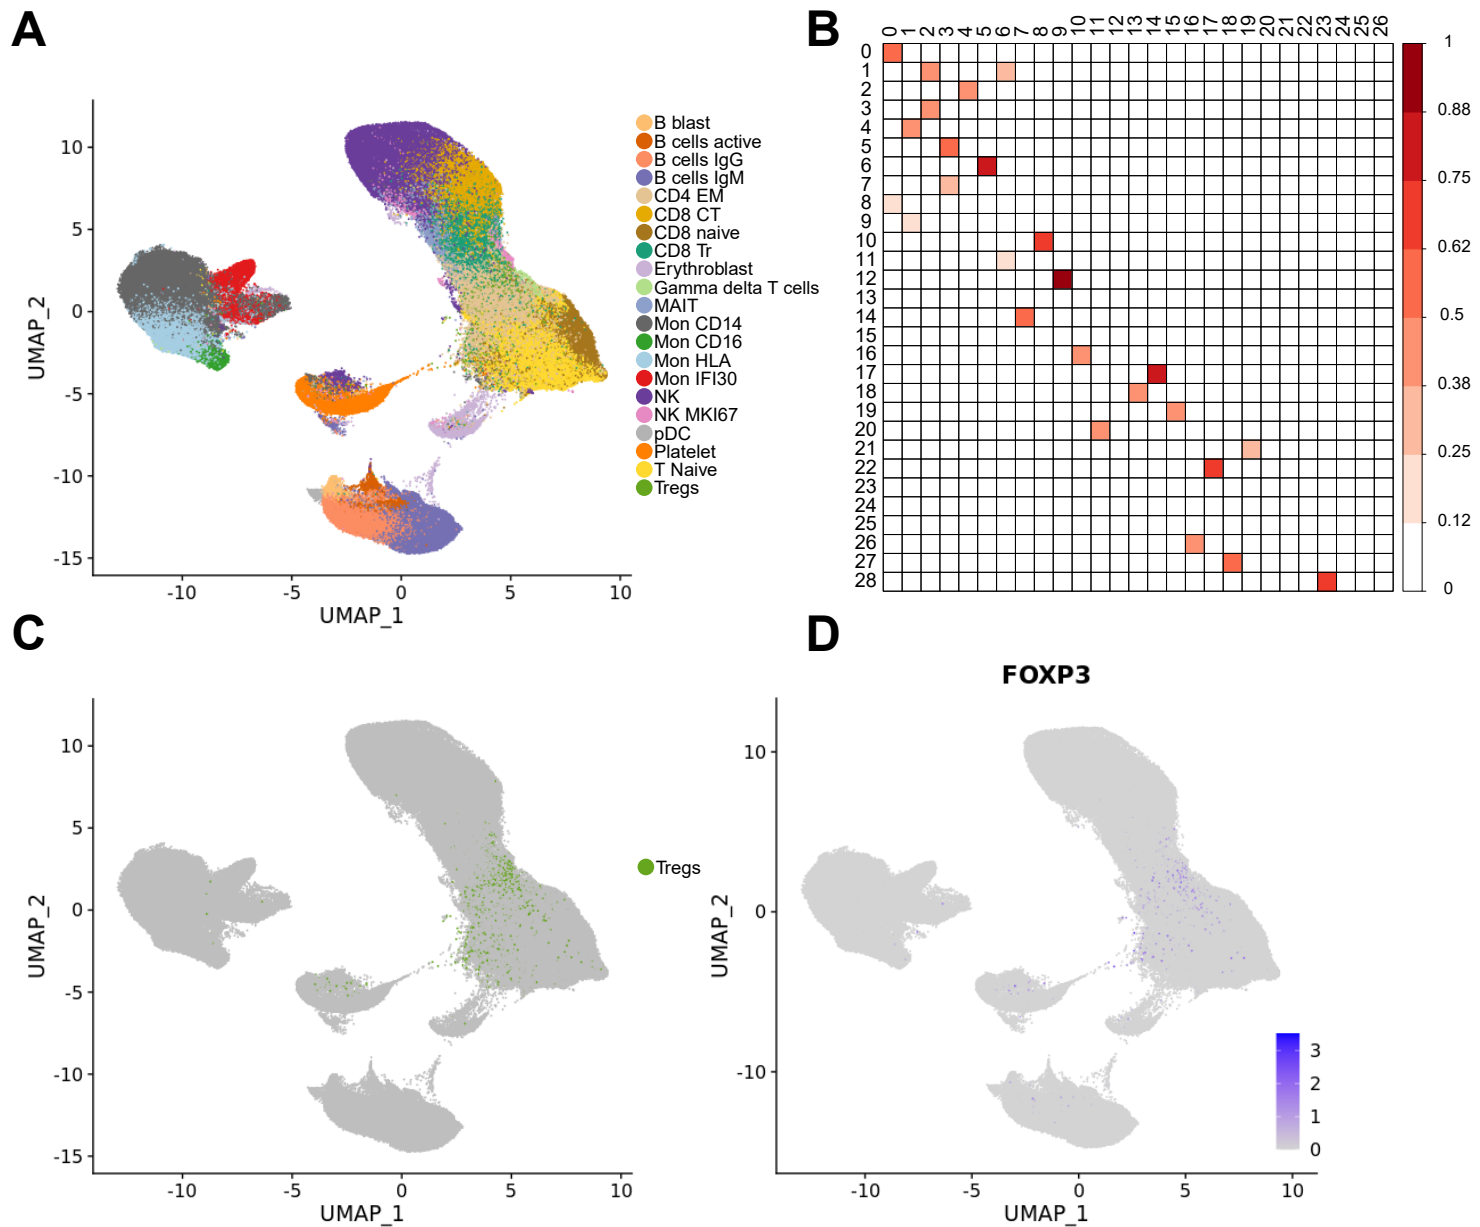

**Figure S2. Comparison of the Seurat CCA and Harmony data integration approaches.** (A) Harmony UMAP plot colored by cell subtypes demonstrates concordance with CCA integration and topological colocalisation of the annotated cell types. (B) Heatmap with Jaccard index identifies high similarity between major clusters obtained with Seurat CCA and Harmony. (C) Treg cell demonstrate disseminated localisation within T-cells compartment. (D) FOXP3 expression is highlighted on the UMAP.

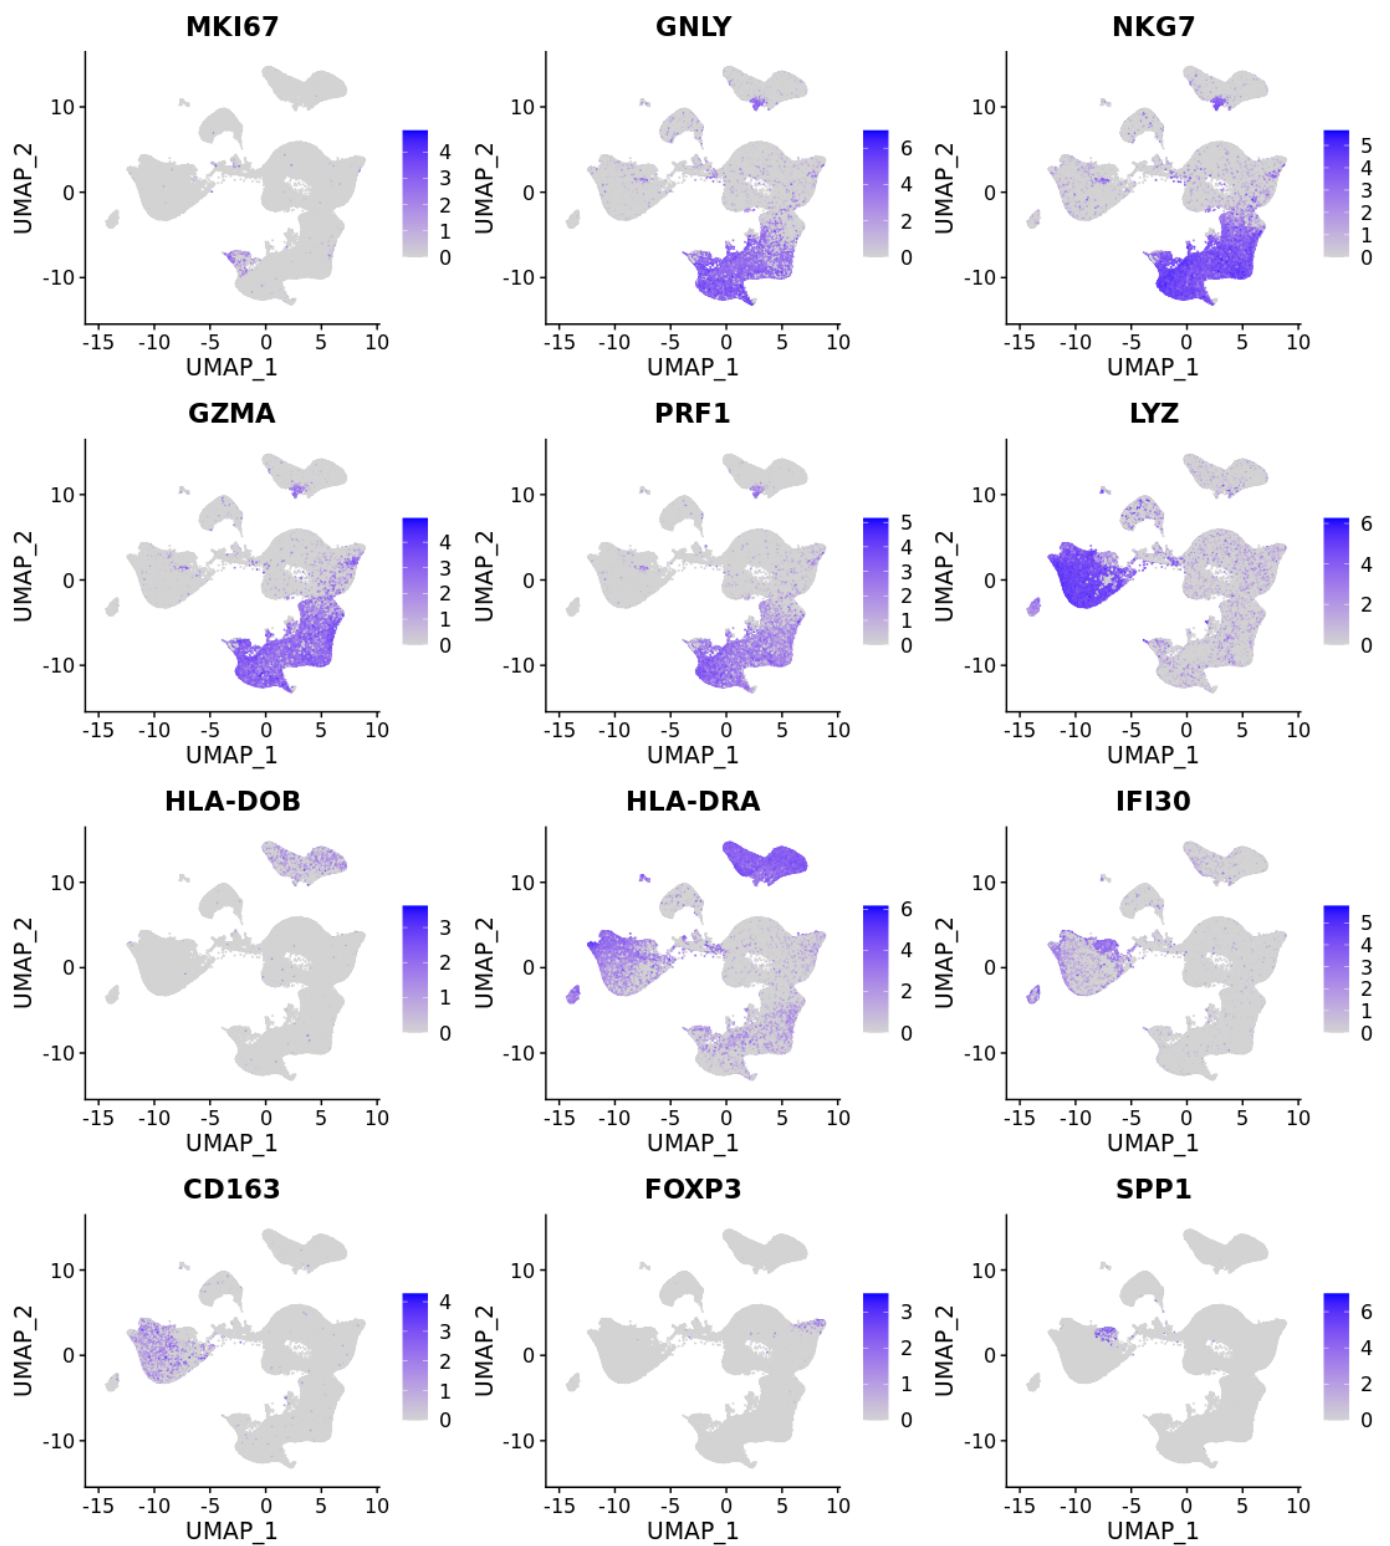

**Figure S3. Feature plots.** Feature plot with gene expression projected on the CCA UMAP plot.

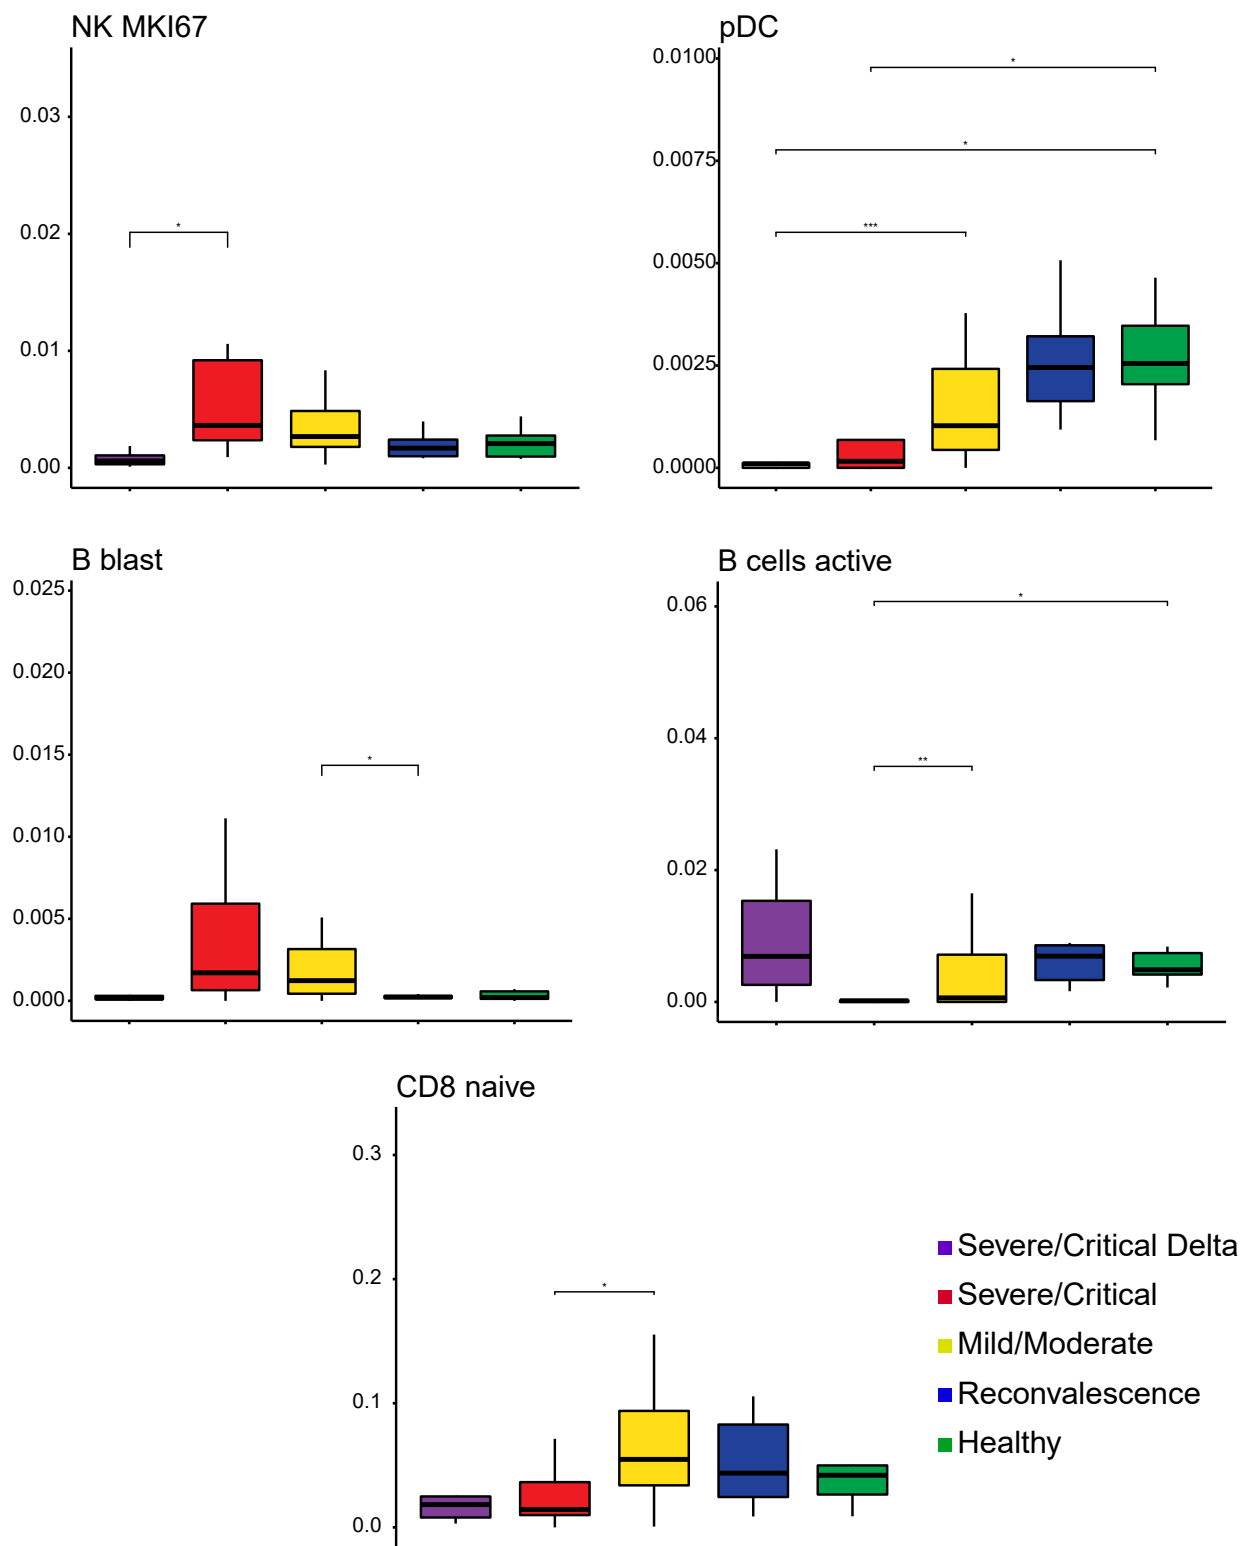

**Figure S4. Changes of the immune cell fractions in PBMC.** Boxplots with changes of the cell fractions for immune subtypes. P-value was calculated using Wilcoxon rank-sum test.



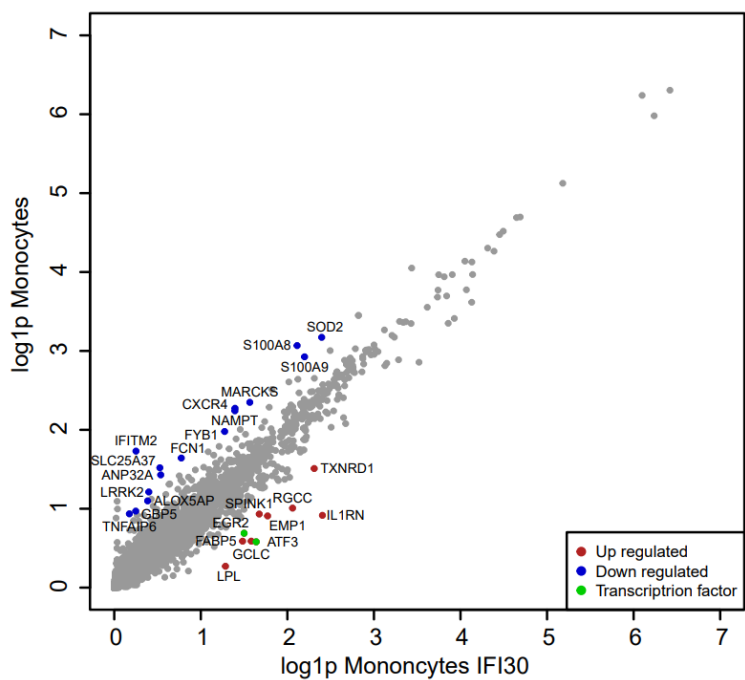

**Figure S5. Scatter plot** showing gene expression changes between Mon IFI30 and other monocytes (Mon CD14, Mon HLA) across all study cohorts. Significant up/downregulated genes are highlighted ( $\log_{2}FC > 2$ ,  $p_{adj} < 0.05$ ).

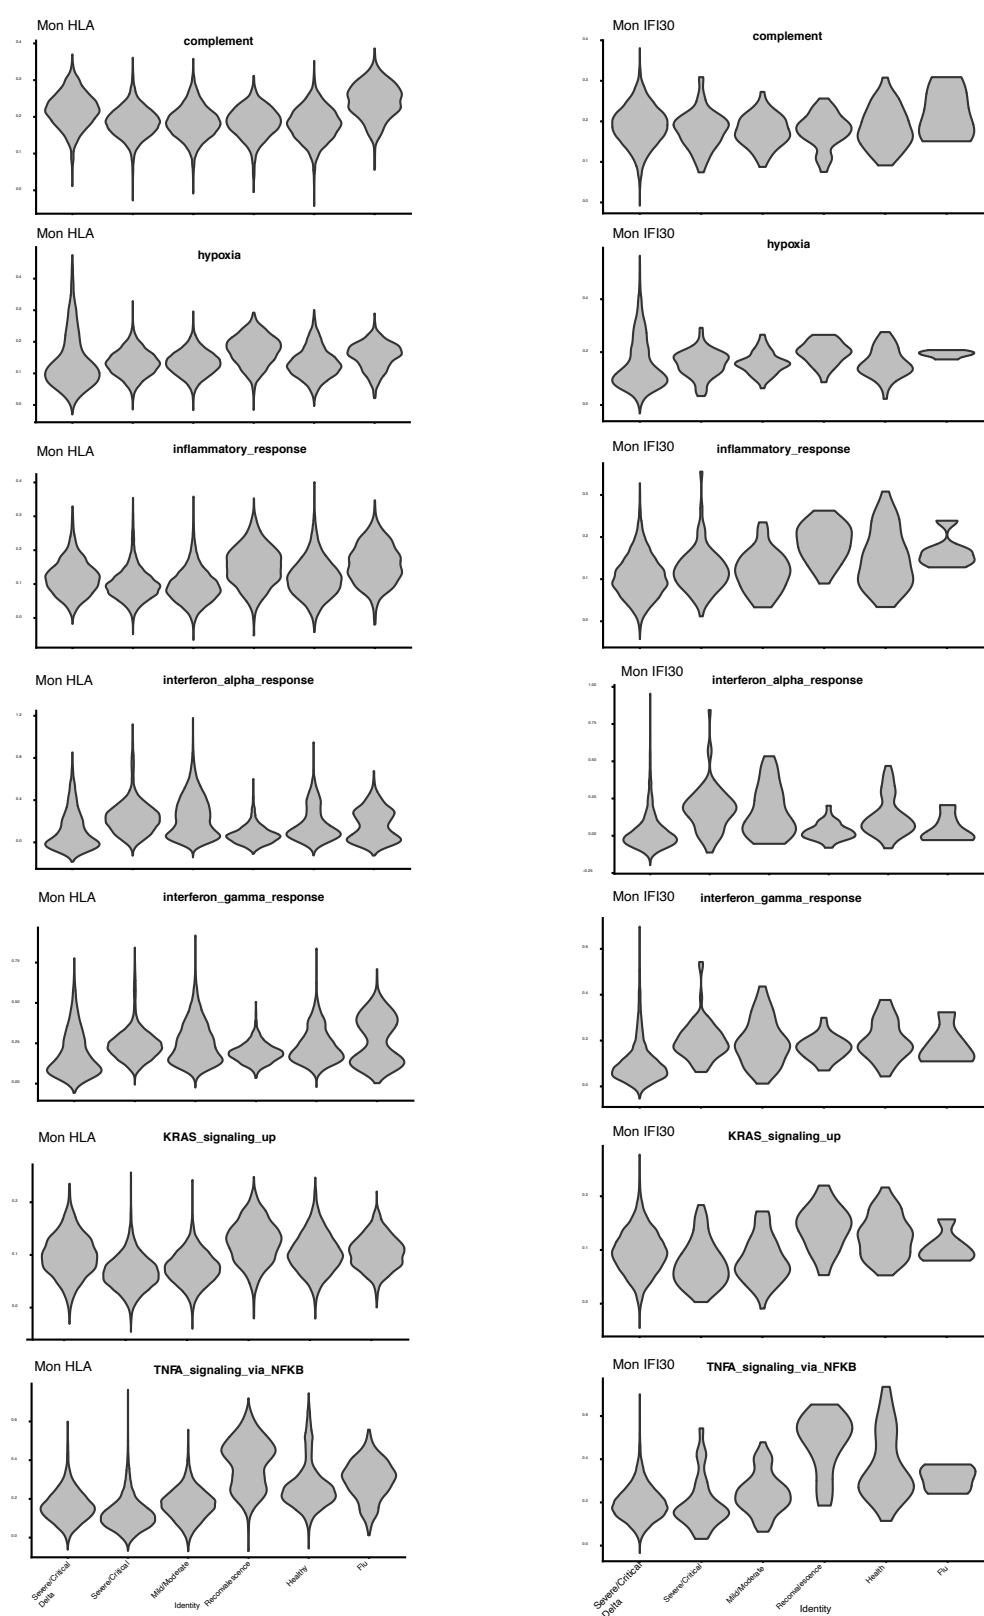

**Figure S6. Module scores for gene signatures.** Violin plots with the gene module scores distribution in Mon IFI30 and Mon HLA across 6 study groups.

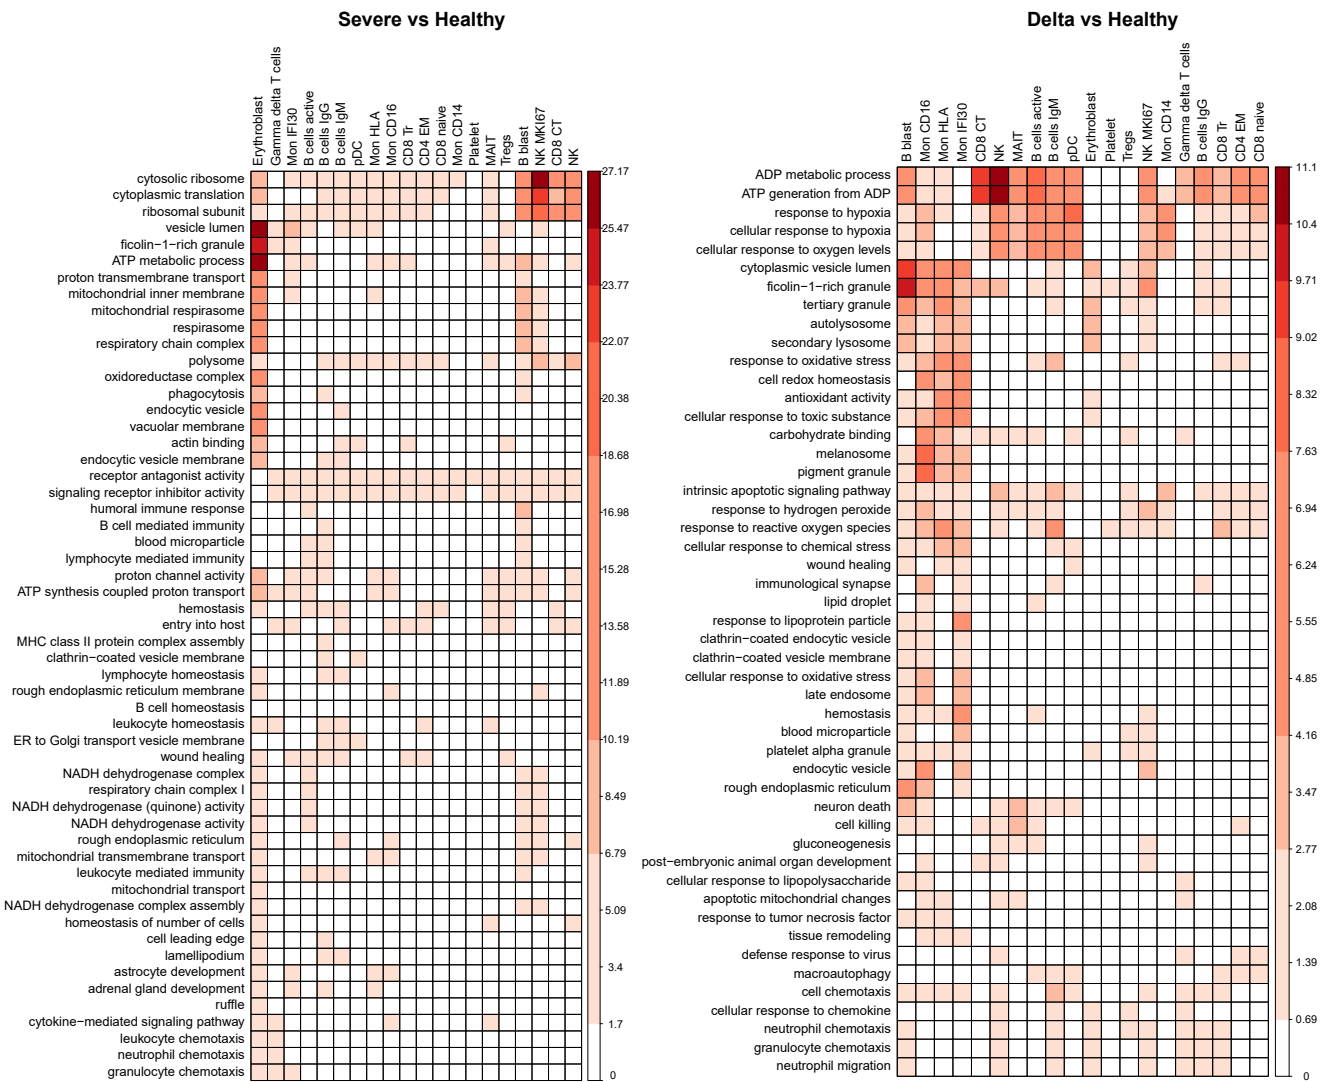

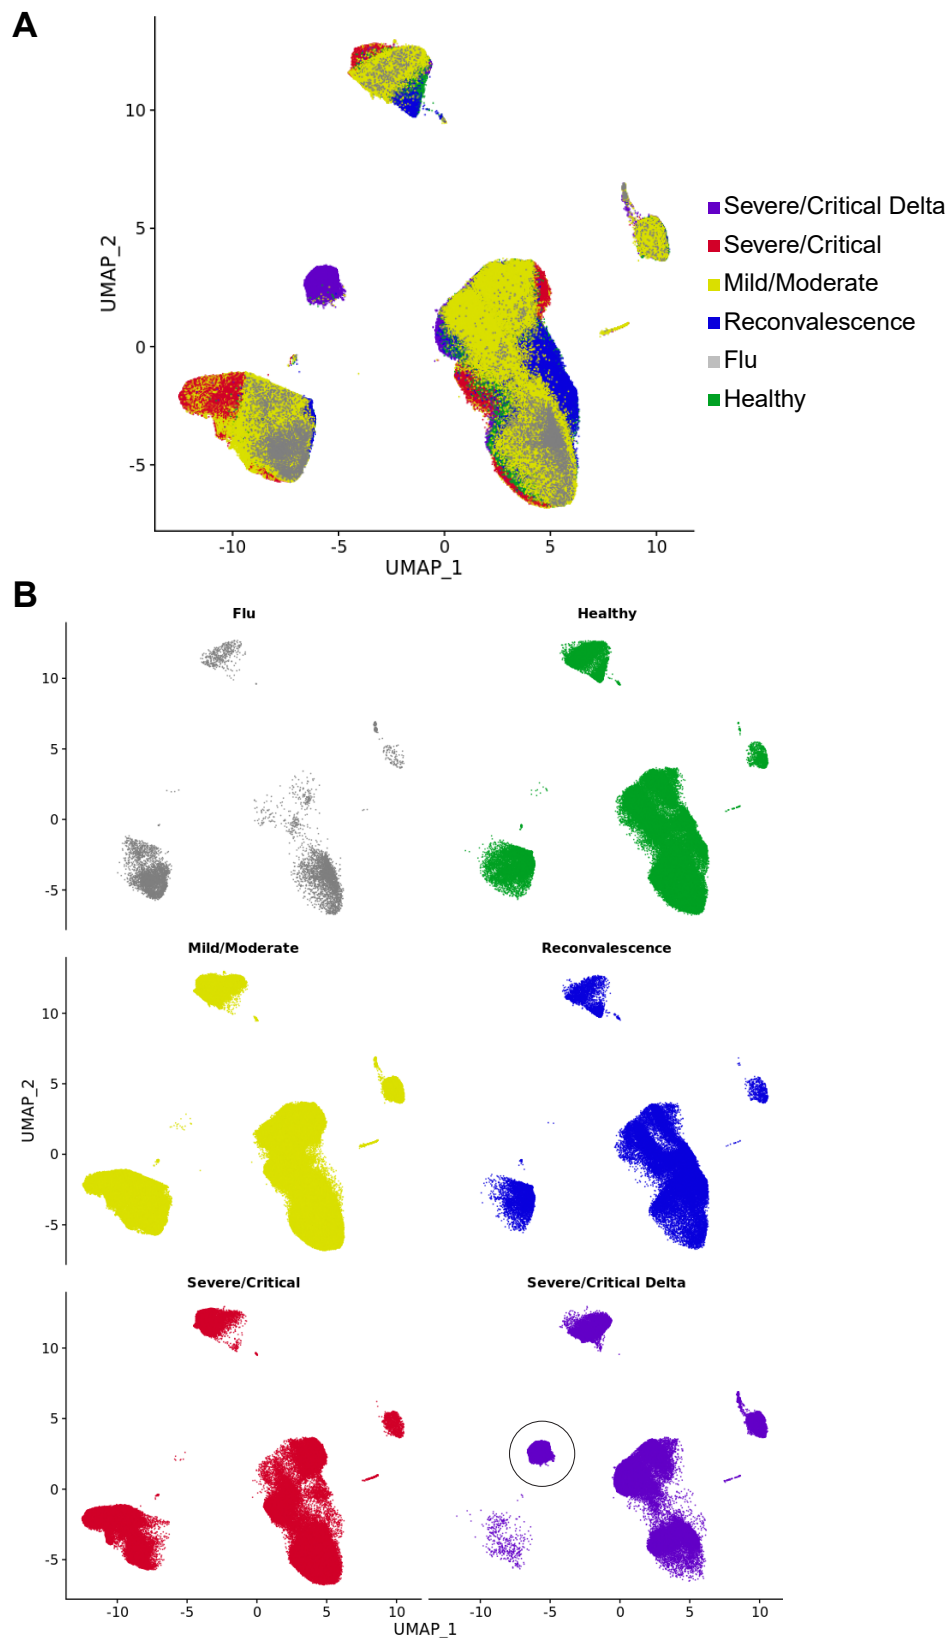

**Figure S8. SCENIC UMAP splitted by severity.** (A) UMAP plot based on combined dataset colored by cohort types. (B) UMAP plot based on SCENIC combined dataset splitted by cohort types. Cell subtype enriched only in the severe Delta samples highlighted with circle.

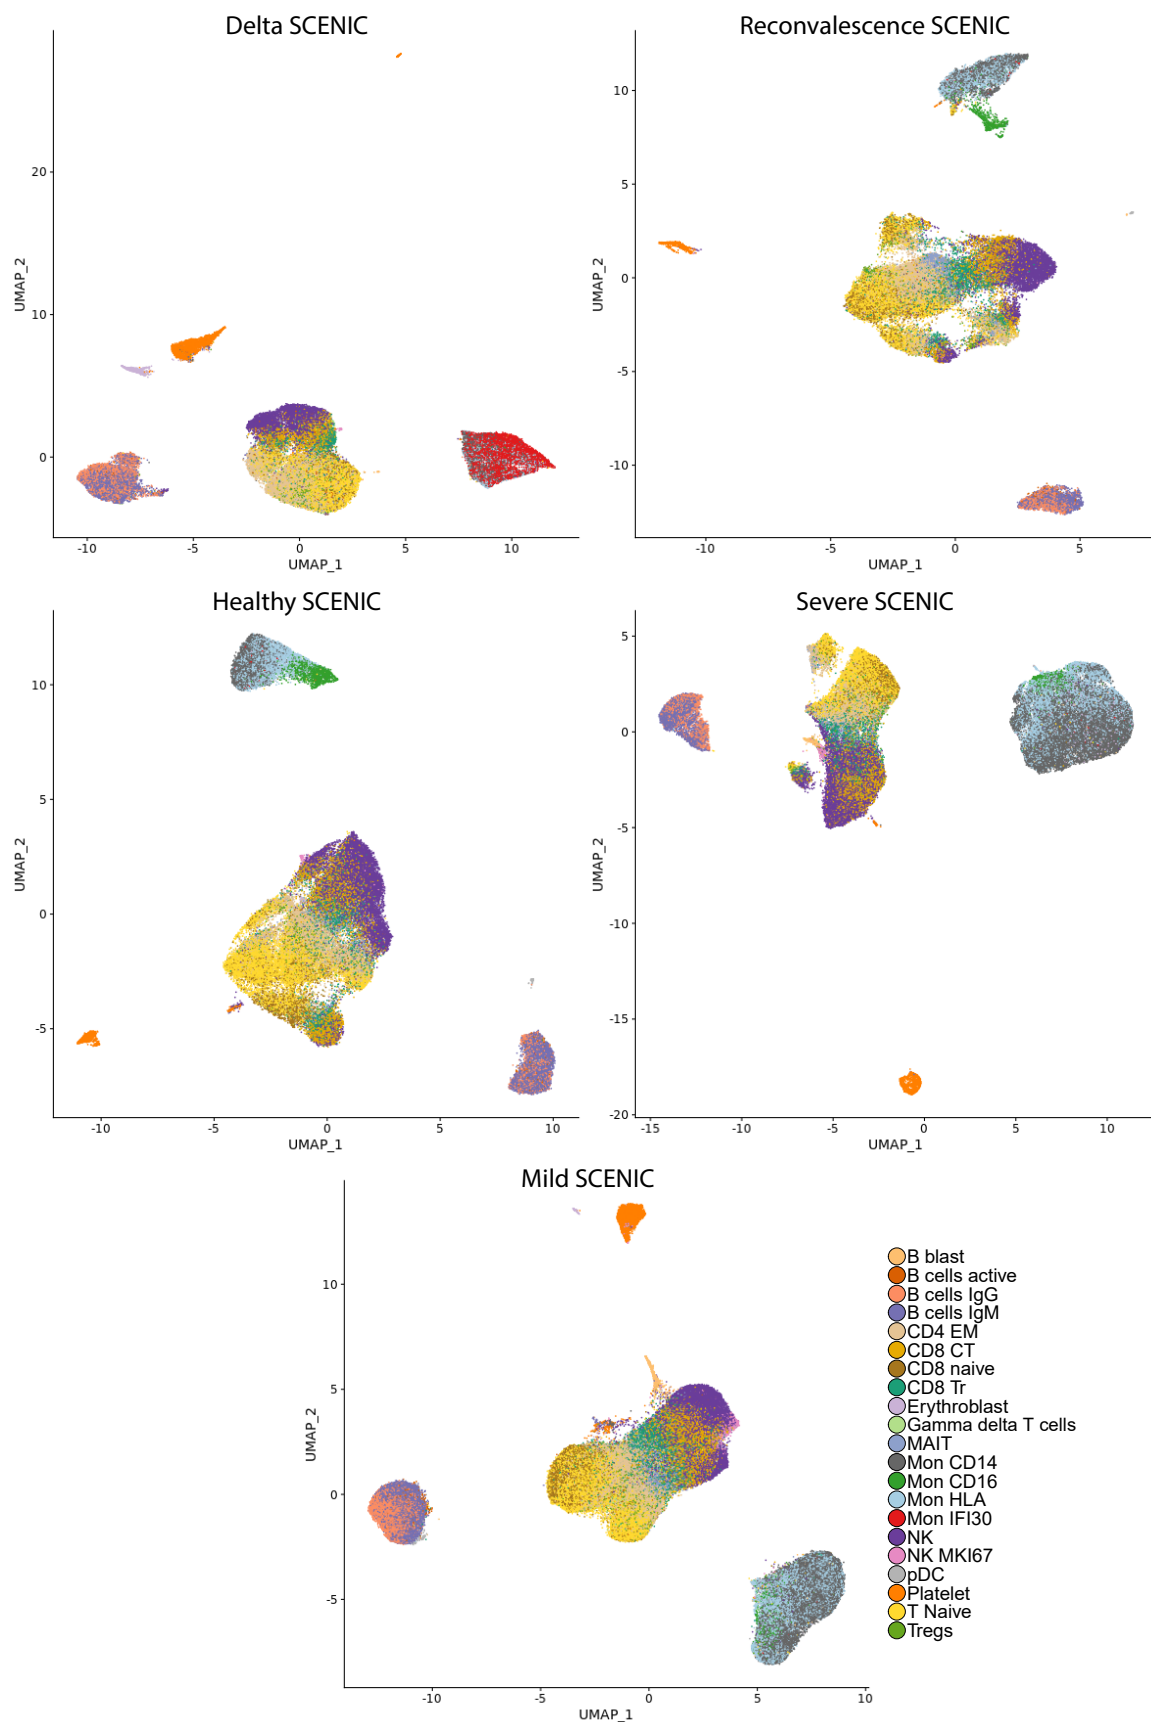

**Figure S9. SCENIC UMAP plots for individually processed cohorts.** Cell types are colored based on the Seurat CCA integration. Annotation was projected on the UMAP obtained for SCENIC cell clustering performed for each cohort independently. Mon IFI30 (shown in red) were identified as a cluster only in severe Delta cases.

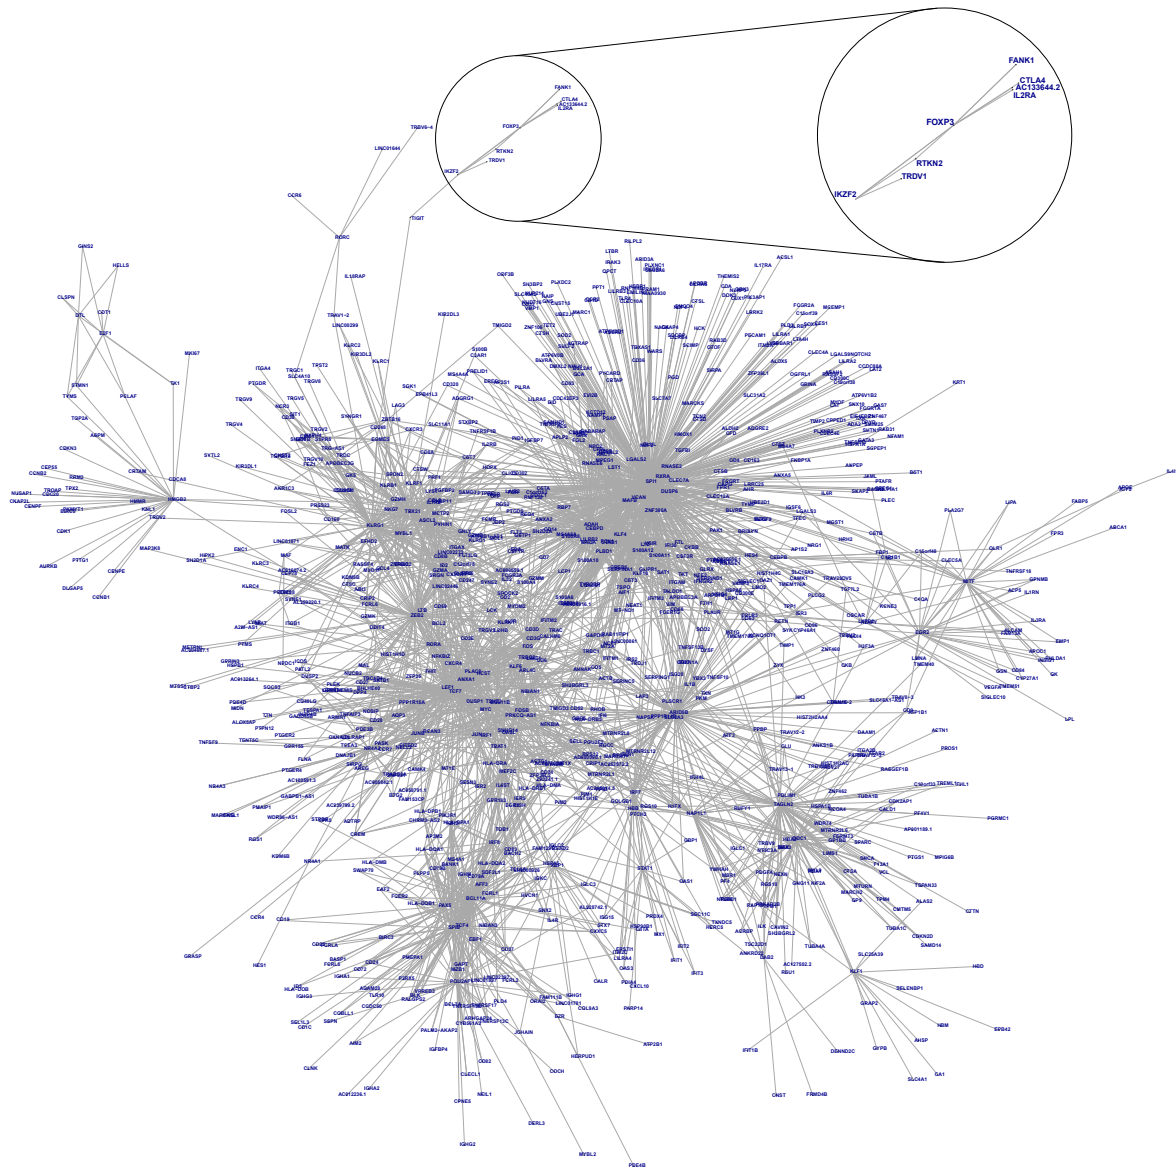

**Figure S10. Entire gene regulatory network.** Gene regulatory network inferred using SCENIC. In order to obtain a strong biological signal we keep only genes with importance scores above 99th percentile. FOXP3 with target genes are highlighted to demonstrate that SCENIC GRN captures known regulators and targets of the minor Treg population in PBMC.

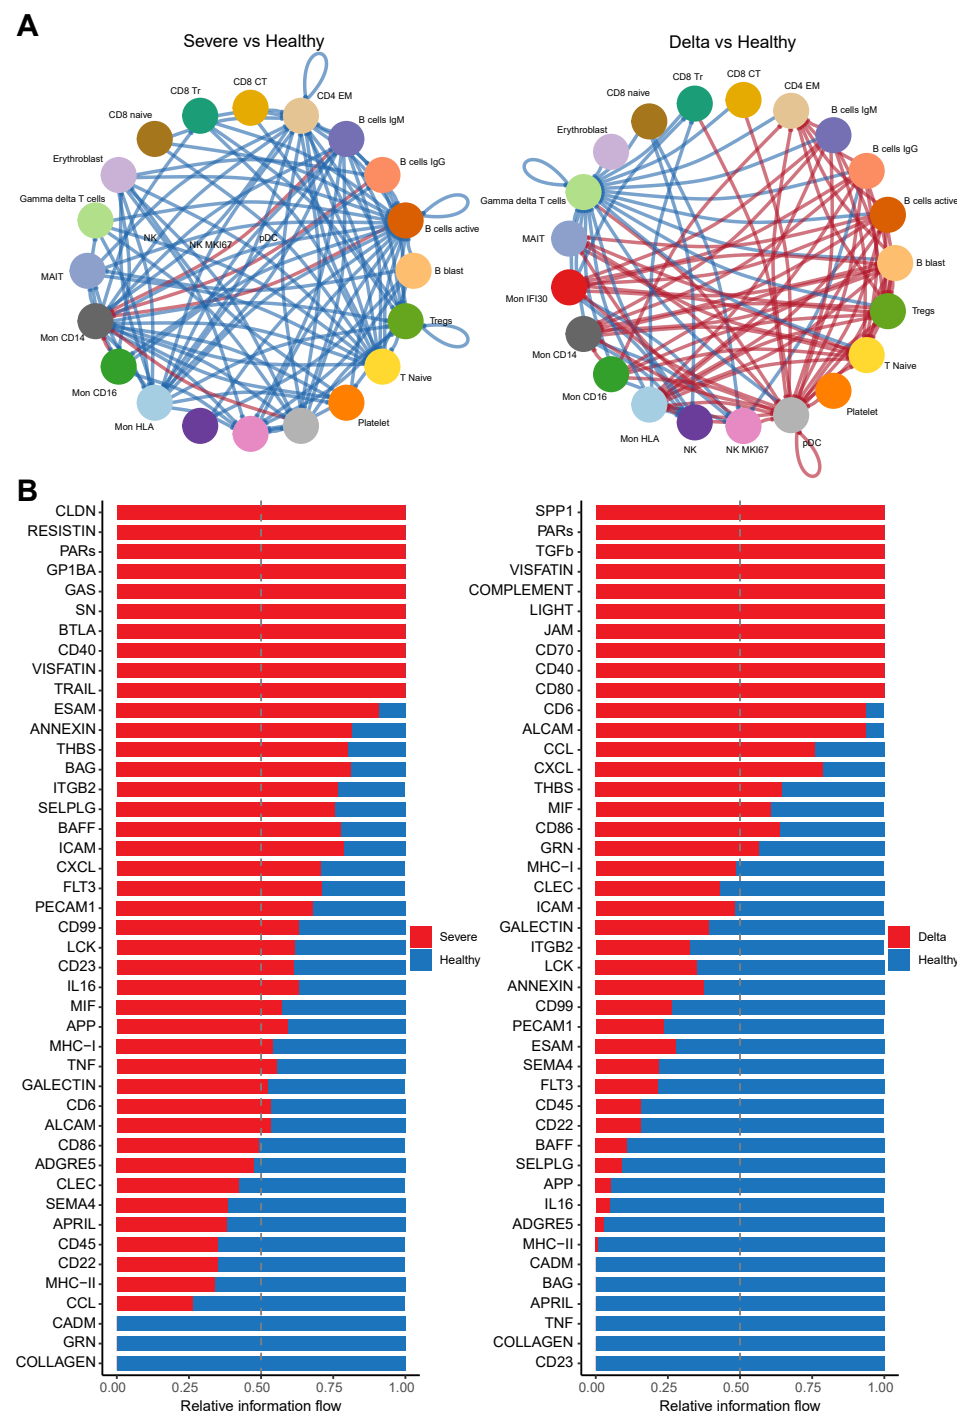

**Figure S11. Cellchat differential interactions.** (A) Circle plot showing predicted differential cell-cell communications between severe Wuhan-like and healthy groups on the left and between Delta and healthy groups on the right. Red lines indicate gained and blue lost cell-cell communications (B) Barplots showing the intensity of context-specific signalling pathways measured as relative information flow as implemented in CellChat. TGF beta and SPP1 are predicted as main signalling molecules involved in cell-cell communication for severe Delta COVID-19 in comparison with healthy individuals. For the severe Wuhan-like samples Resistin, and Caledon were predicted as main communication molecules.

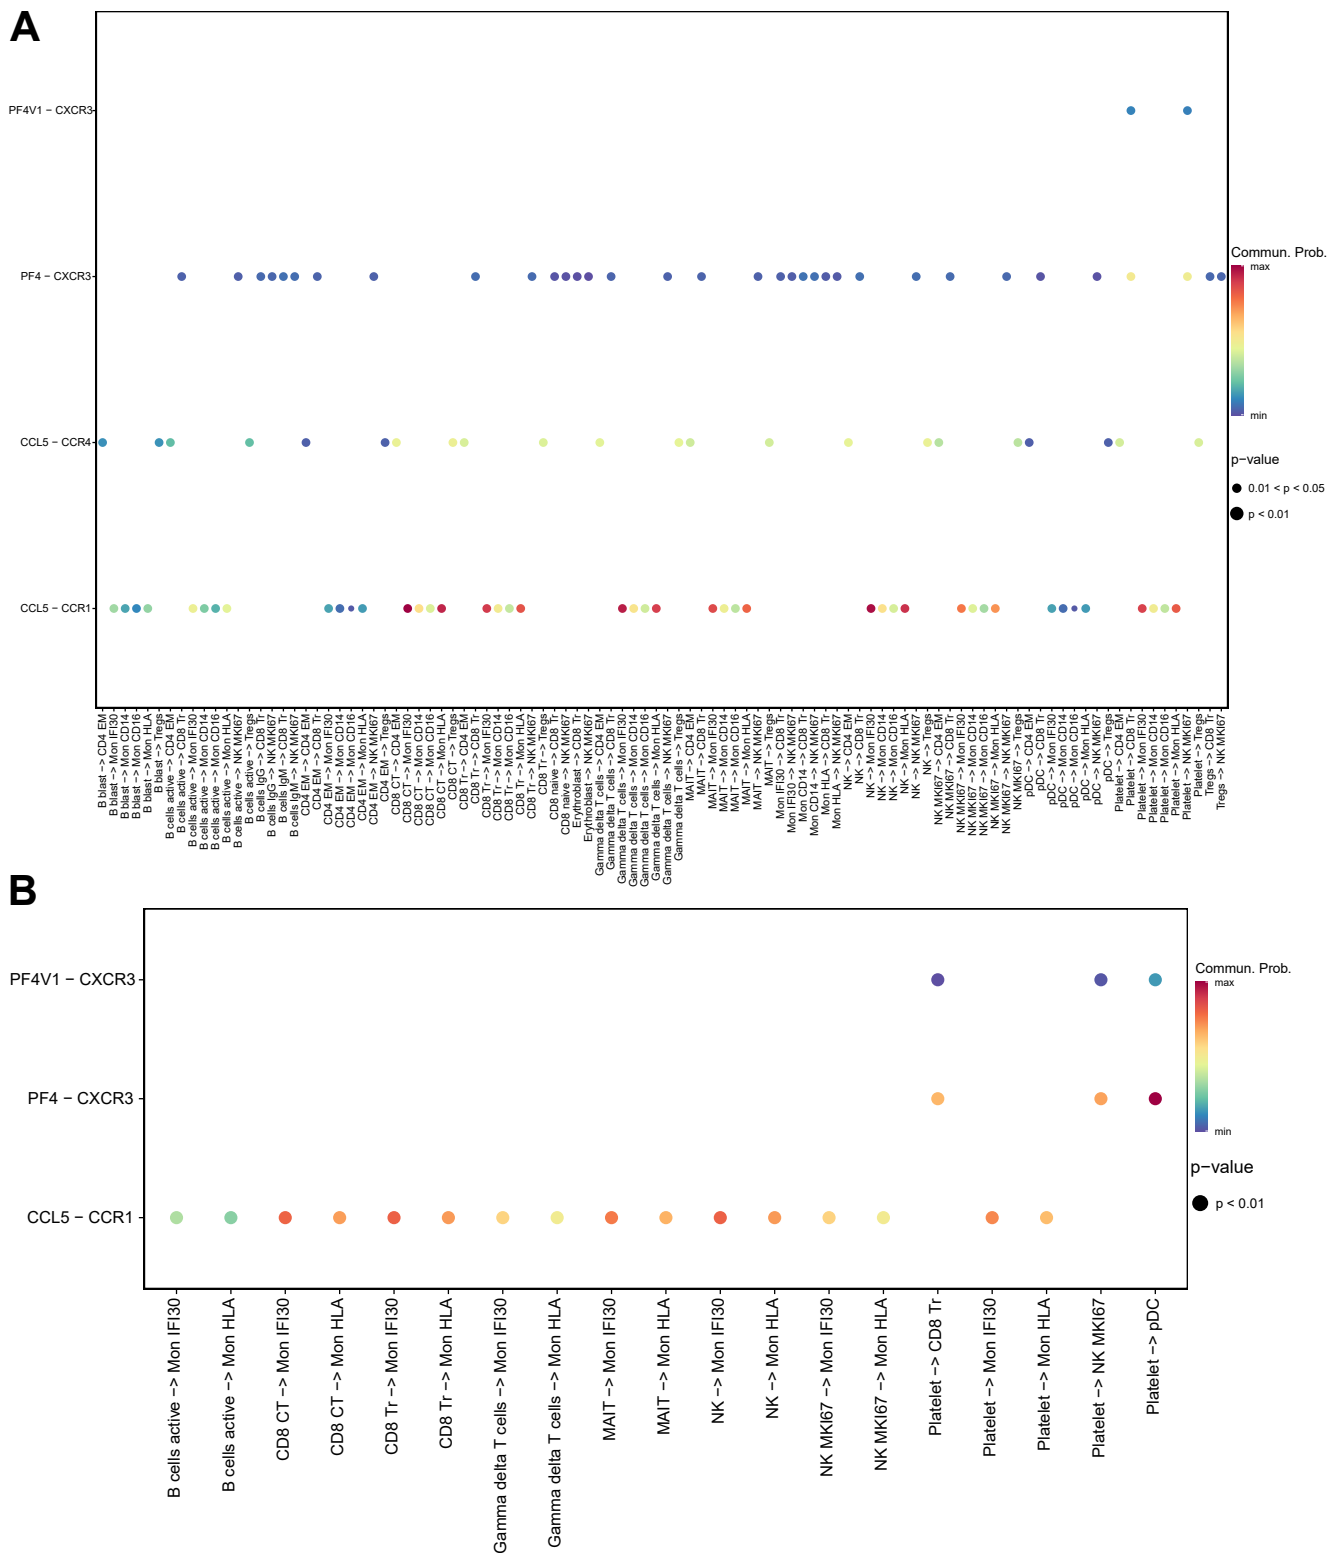

**Figure S12. Dotplot for communication molecules of the CCL-CXCL pathway.** (A) Dotplot showing cell pairs (x-axis) and predicted interacting ligand-receptors (y-axis) for CCL-CXCL pathways obtained for severe Wuhan-like groups. Colour on the dotplot shows the strength of a given ligand-receptor interaction quantitatively represented by a probability value obtained with CellChat using law of mass action and approximated based on the average expression of the ligand-receptors by query cell groups. (B) Dotplot showing cell pairs (x-axis) and predicted interacting ligand-receptors (y-axis) for CCL-CXCL pathways obtained for severe Delta group. Colour on the dotplot shows the strength of a given ligand-receptor interaction quantitatively represented by a probability value obtained with CellChat using law of mass action and approximated based on the average expression of the ligand-receptors by query cell groups.



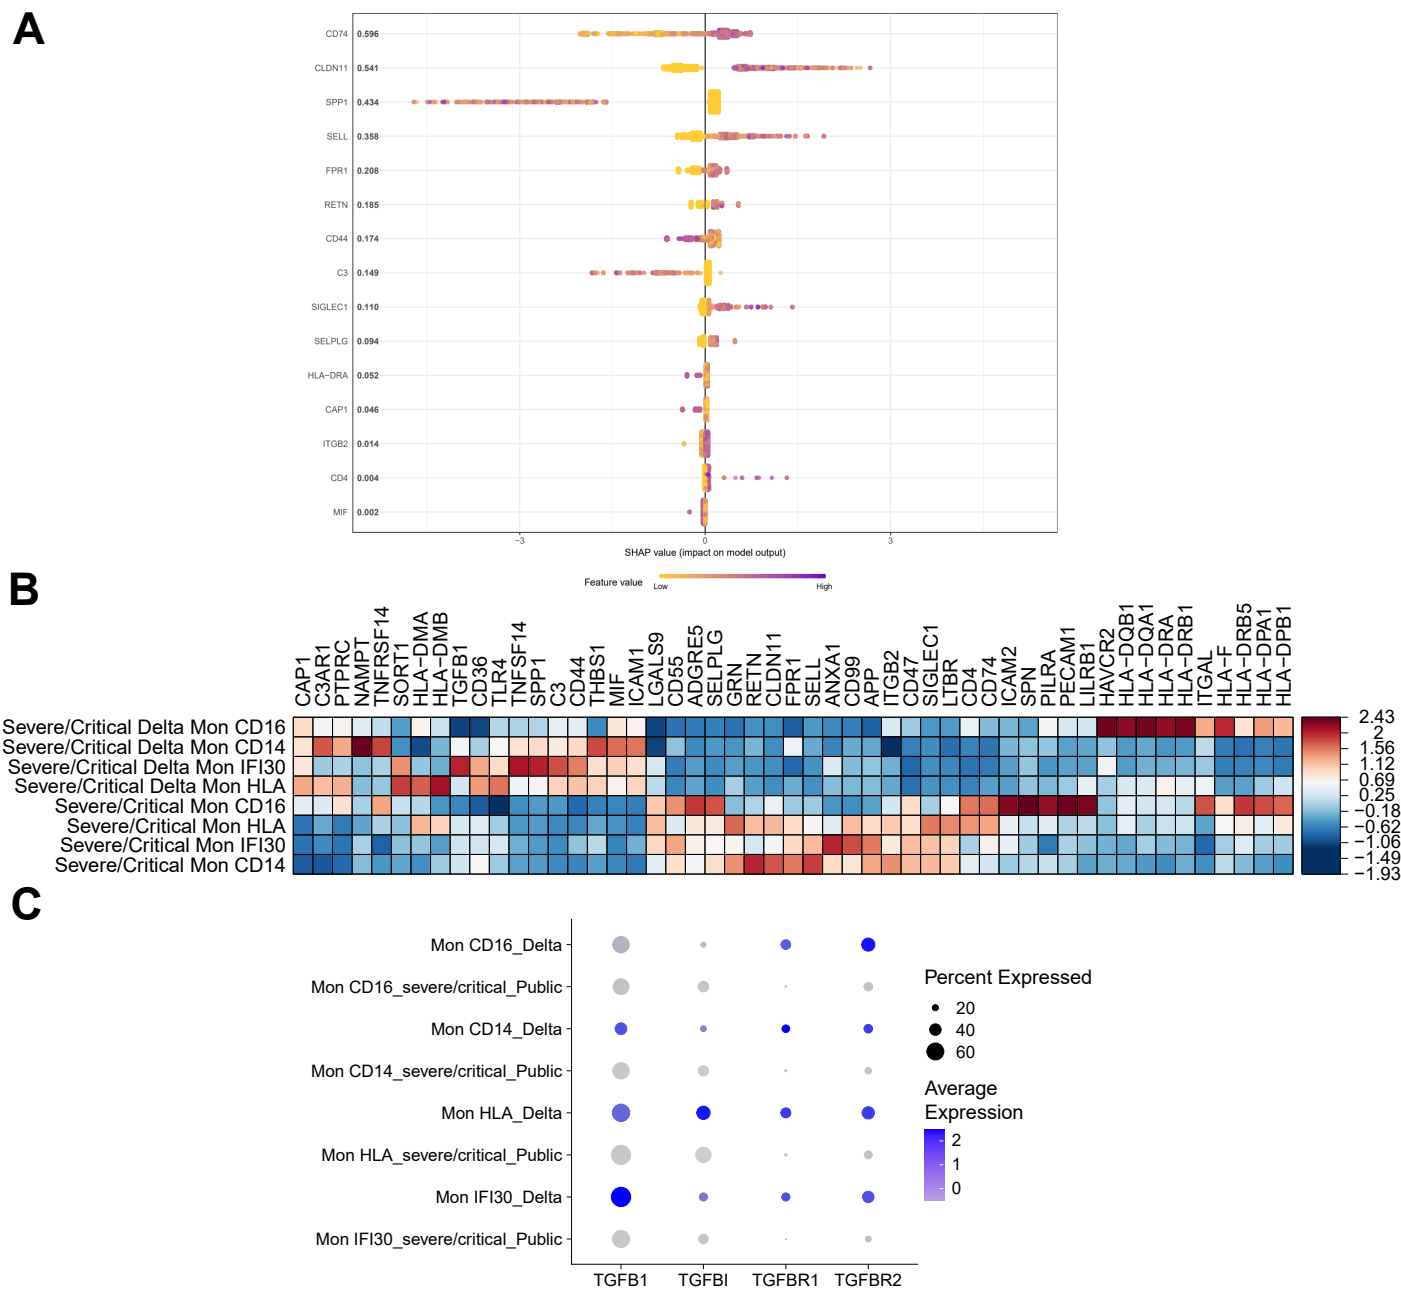

**Table S1.** Description of the in-house and public datasets used in the study

| SampleID | Severity        | Dataset               | Data_source        |
|----------|-----------------|-----------------------|--------------------|
| 108      | Rec             | Reconvalescence       | In-house           |
| 109      | Healthy         | Healthy               | In-house           |
| 110      | Healthy         | Healthy               | In-house           |
| 112      | Healthy         | Healthy               | In-house           |
| 113      | Healthy         | Healthy               | In-house           |
| 114      | Healthy         | Healthy               | In-house           |
| 115      | Healthy         | Healthy               | In-house           |
| 134      | mild/moderate   | Mild/Moderate         | In-house           |
| 144      | mild/moderate   | Mild/Moderate         | In-house           |
| 147      | mild/moderate   | Mild/Moderate         | In-house           |
| 148      | mild/moderate   | Mild/Moderate         | In-house           |
| 151      | mild/moderate   | Mild/Moderate         | In-house           |
| 165      | Healthy         | Healthy               | In-house           |
| 166      | Healthy         | Healthy               | In-house           |
| 167      | Rec             | Reconvalescence       | In-house           |
| 172      | Rec             | Reconvalescence       | In-house           |
| 207      | Healthy         | Healthy               | In-house           |
| 208      | Rec             | Reconvalescence       | In-house           |
| 218      | Rec             | Reconvalescence       | In-house           |
| 245      | Rec             | Reconvalescence       | In-house           |
| 3        | severe/critical | Flu                   | Public (GSE149689) |
| 4        | severe/critical | Flu                   | Public (GSE149689) |
| 413      | mild/moderate   | Mild/Moderate         | In-house           |
| 414      | mild/moderate   | Mild/Moderate         | In-house           |
| 415      | mild/moderate   | Mild/Moderate         | In-house           |
| 416      | mild/moderate   | Mild/Moderate         | In-house           |
| 417      | mild/moderate   | Mild/Moderate         | In-house           |
| 418      | mild/moderate   | Mild/Moderate         | In-house           |
| 419      | mild/moderate   | Mild/Moderate         | In-house           |
| 420      | mild/moderate   | Mild/Moderate         | In-house           |
| 561      | severe/critical | Severe/Critical Delta | In-house           |
| 562      | severe/critical | Severe/Critical Delta | In-house           |
| 564      | severe/critical | Severe/Critical Delta | In-house           |
| 565      | severe/critical | Severe/Critical Delta | In-house           |
| 567      | severe/critical | Severe/Critical Delta | In-house           |
| 568      | severe/critical | Severe/Critical Delta | In-house           |
| 569      | severe/critical | Severe/Critical Delta | In-house           |
| 573      | severe/critical | Severe/Critical Delta | In-house           |
| 574      | severe/critical | Severe/Critical Delta | In-house           |
| 6        | severe/critical | Flu                   | Public (GSE149689) |
| 67       | mild/moderate   | Mild/Moderate         | In-house           |
| 68       | mild/moderate   | Mild/Moderate         | In-house           |
| 69       | mild/moderate   | Mild/Moderate         | In-house           |
| 7        | severe/critical | Flu                   | Public (GSE149689) |
| 8        | severe/critical | Flu                   | Public (GSE149689) |
| S-M017   | mild/moderate   | Mild/Moderate         | Public (GSE158055) |
| S-M023   | mild/moderate   | Mild/Moderate         | Public (GSE158055) |
| S-M035-1 | mild/moderate   | Mild/Moderate         | Public (GSE158055) |
| S-M041-2 | mild/moderate   | Mild/Moderate         | Public (GSE158055) |
| S-M043-1 | mild/moderate   | Mild/Moderate         | Public (GSE158055) |
| S-M043-2 | mild/moderate   | Mild/Moderate         | Public (GSE158055) |
| S-M044-1 | mild/moderate   | Mild/Moderate         | Public (GSE158055) |
| S-M046   | mild/moderate   | Mild/Moderate         | Public (GSE158055) |
| S-M047   | mild/moderate   | Mild/Moderate         | Public (GSE158055) |
| S-M065   | mild/moderate   | Mild/Moderate         | Public (GSE158055) |
| S-M067   | mild/moderate   | Mild/Moderate         | Public (GSE158055) |
| S-M069   | mild/moderate   | Mild/Moderate         | Public (GSE158055) |
| S-M073   | mild/moderate   | Mild/Moderate         | Public (GSE158055) |
| S-M074-2 | mild/moderate   | Mild/Moderate         | Public (GSE158055) |
| S-M076-2 | mild/moderate   | Mild/Moderate         | Public (GSE158055) |
| S-M078   | mild/moderate   | Mild/Moderate         | Public (GSE158055) |
| S-S001-2 | severe/critical | Severe/Critical       | Public (GSE158055) |
| S-S028   | severe/critical | Severe/Critical       | Public (GSE158055) |
| S-S029   | severe/critical | Severe/Critical       | Public (GSE158055) |
| S-S030   | severe/critical | Severe/Critical       | Public (GSE158055) |
| S-S031   | severe/critical | Severe/Critical       | Public (GSE158055) |
| S-S054   | severe/critical | Severe/Critical       | Public (GSE158055) |
| S-S057   | severe/critical | Severe/Critical       | Public (GSE158055) |
| S-S077   | severe/critical | Severe/Critical       | Public (GSE158055) |
| S-S079   | severe/critical | Severe/Critical       | Public (GSE158055) |
| S-S082   | severe/critical | Severe/Critical       | Public (GSE158055) |
| S-S085-2 | severe/critical | Severe/Critical       | Public (GSE158055) |
| S-S086-2 | severe/critical | Severe/Critical       | Public (GSE158055) |
| S-S089-2 | severe/critical | Severe/Critical       | Public (GSE158055) |
| S-S090-2 | severe/critical | Severe/Critical       | Public (GSE158055) |
| S-S091   | severe/critical | Severe/Critical       | Public (GSE158055) |
| S-S092   | severe/critical | Severe/Critical       | Public (GSE158055) |
