# Supplementary material for: Single-Cell Gene Expression Analysis Revealed Immune Cell Signatures of Delta COVID-19
Source: MDPI journal article supplement (doi:10.3390/cells11192950), 2022-09-21
Supplement: s1 [file s1]

NK MKI67

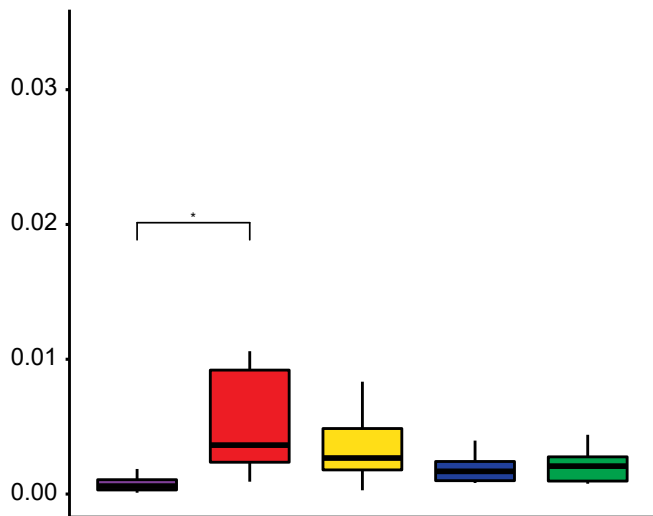

pDC

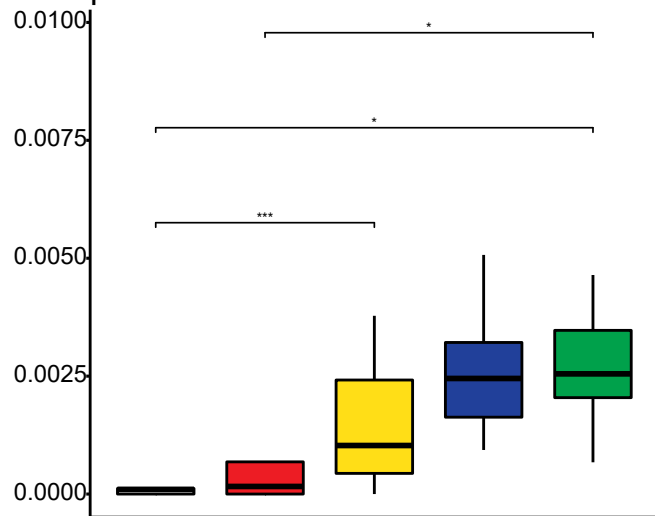

B blast

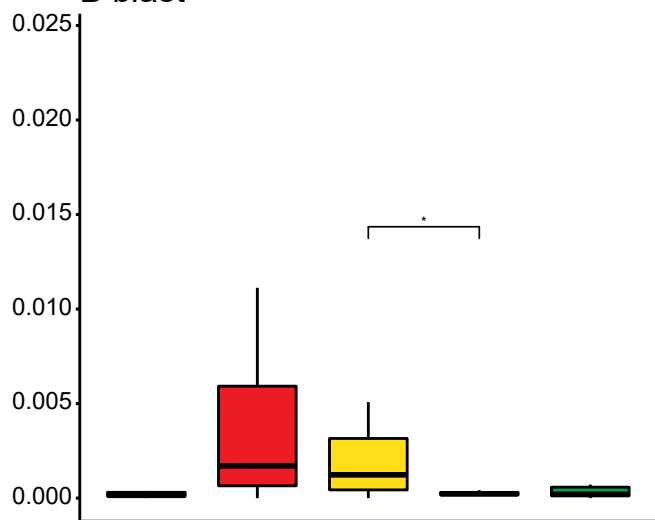

B cells active

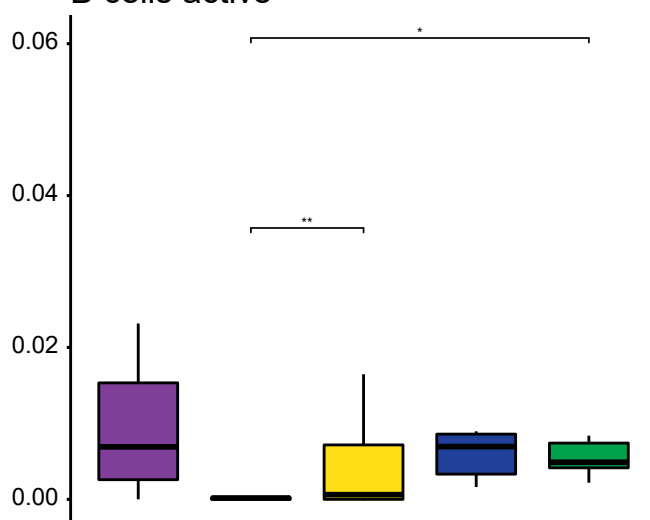

CD8 naive

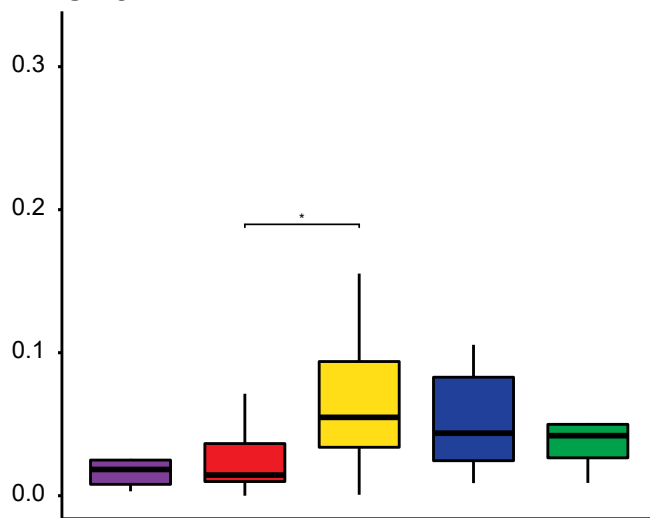

- Severe/Critical Delta
- Severe/Critical
- Mild/Moderate
- Reconvalescence
- Healthy
