# Supplementary material for: Single-Cell Gene Expression Analysis Revealed Immune Cell Signatures of Delta COVID-19
Source: MDPI journal article supplement (doi:10.3390/cells11192950), 2022-09-21
Supplement: s1 [file s1]

Delta SCENIC

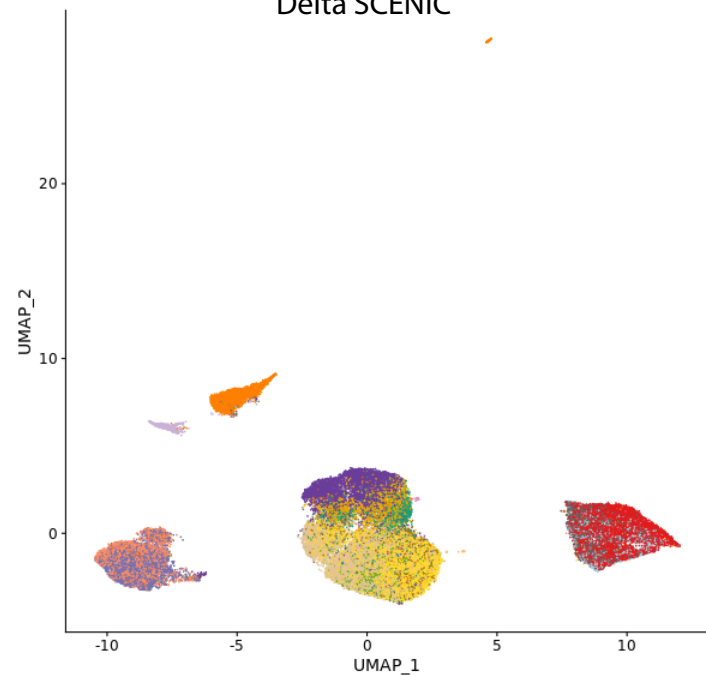

Reconvalescence SCENIC

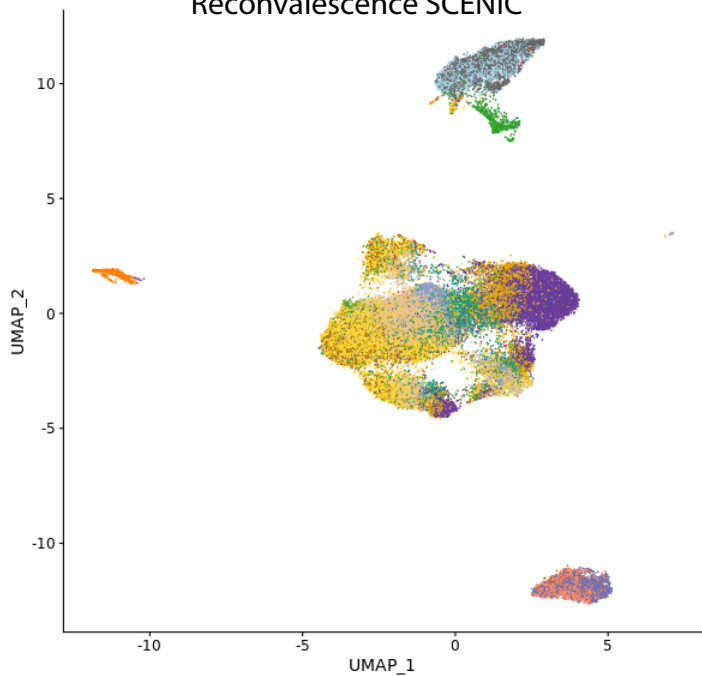

Healthy SCENIC

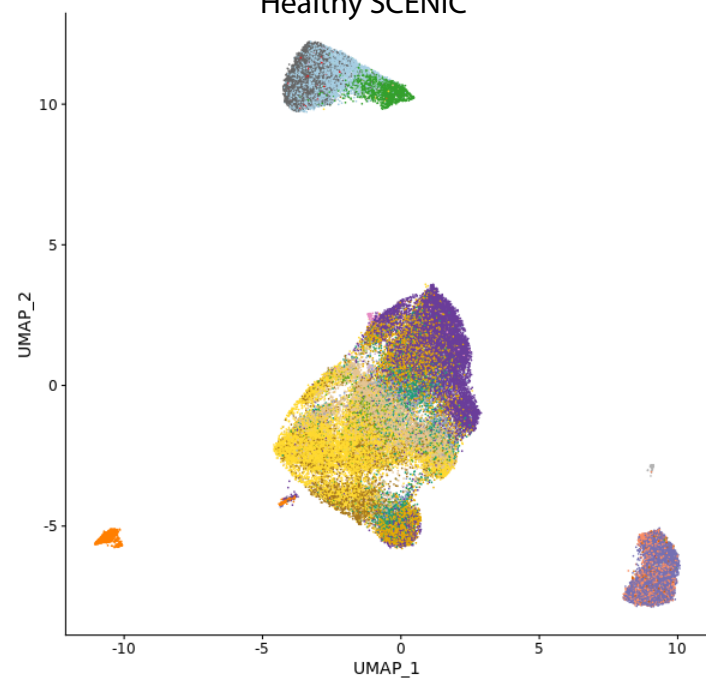

Severe SCENIC

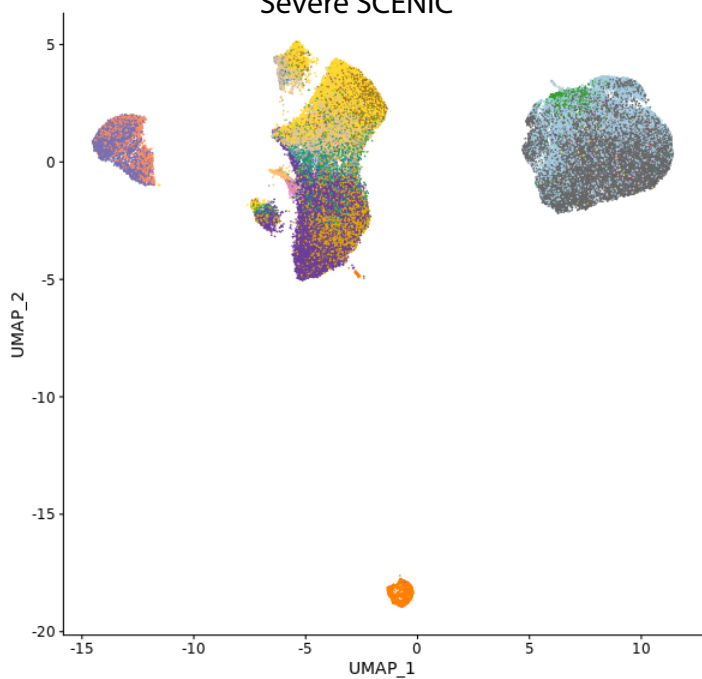

Mild SCENIC

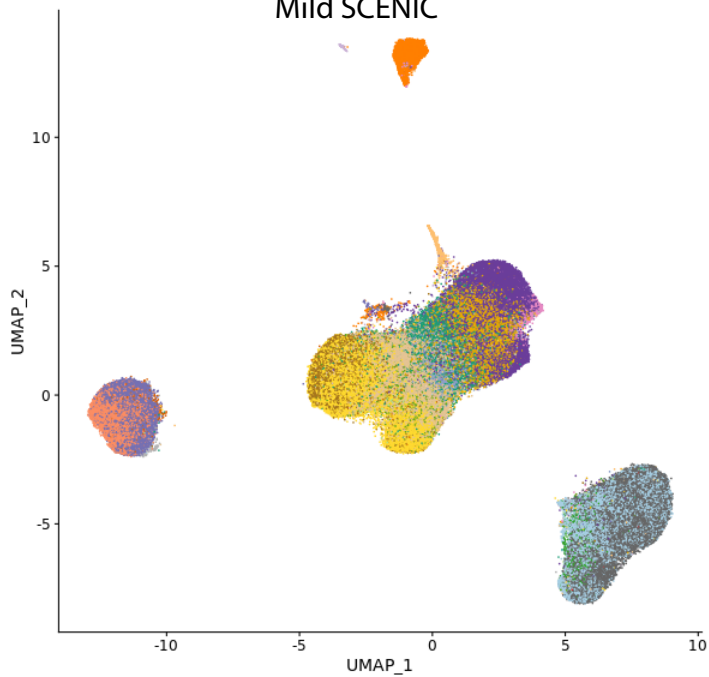

- B blast
- B cells active
- B cells IgG
- B cells IgM
- CD4 EM
- CD8 CT
- CD8 naive
- CD8 Tr
- Erythroblast
- Gamma delta T cells
- MAIT
- Mon CD14
- Mon CD16
- Mon HLA
- Mon IFI30
- NK
- NK MKI67
- pDC
- Platelet
- T Naive
- Tregs
