# Supplementary figures and images for: Single-Cell Gene Expression Analysis Revealed Immune Cell Signatures of Delta COVID-19
Source: MDPI journal article supplement (doi:10.3390/cells11192950), 2022-09-21

## Severe vs Healthy

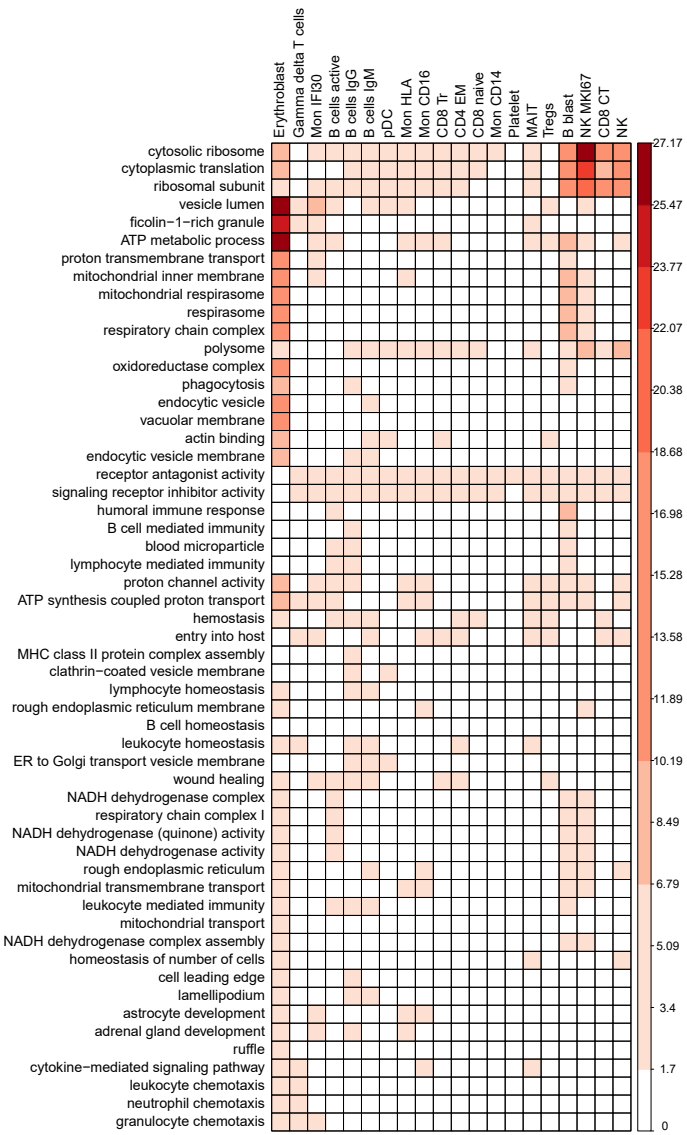

## Delta vs Healthy

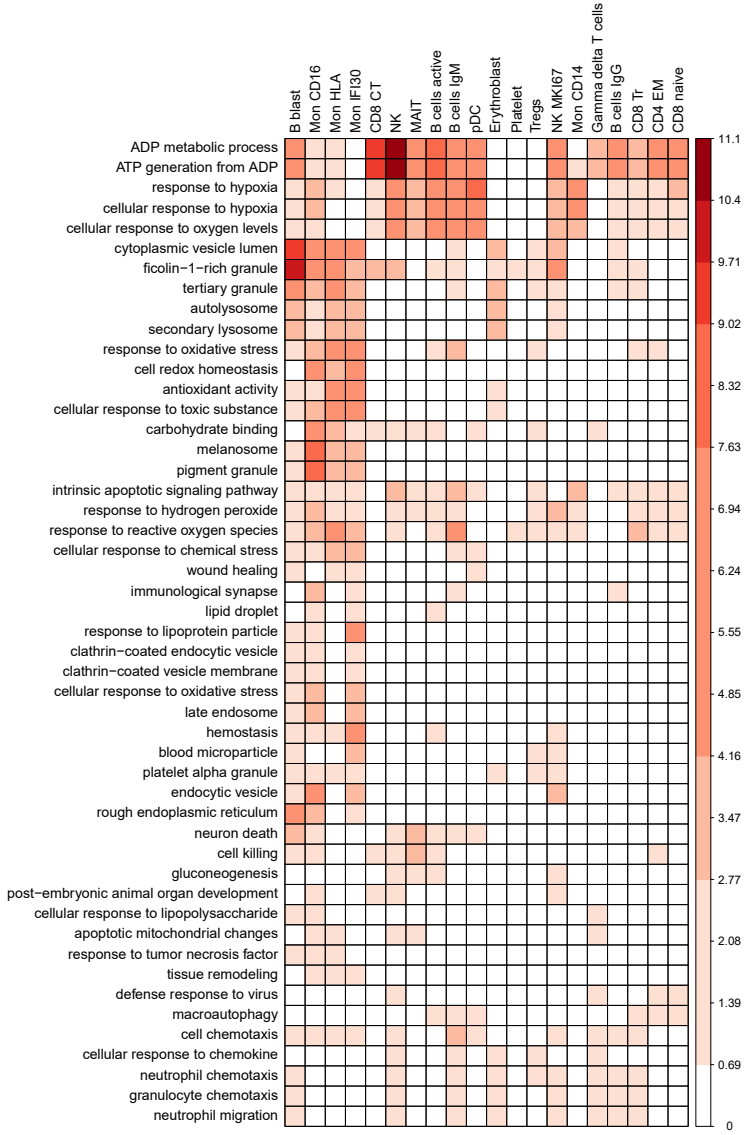

Supplement: s1 [file s1]

A

## Severe vs Healthy

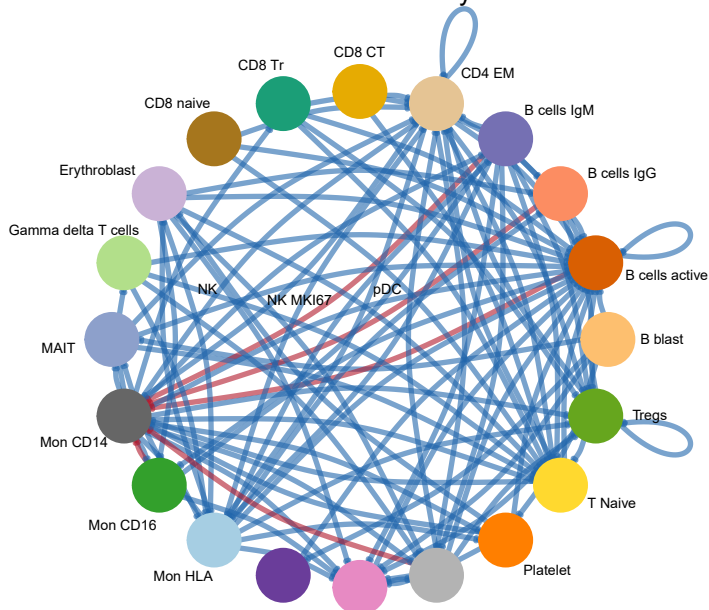

## Delta vs Healthy

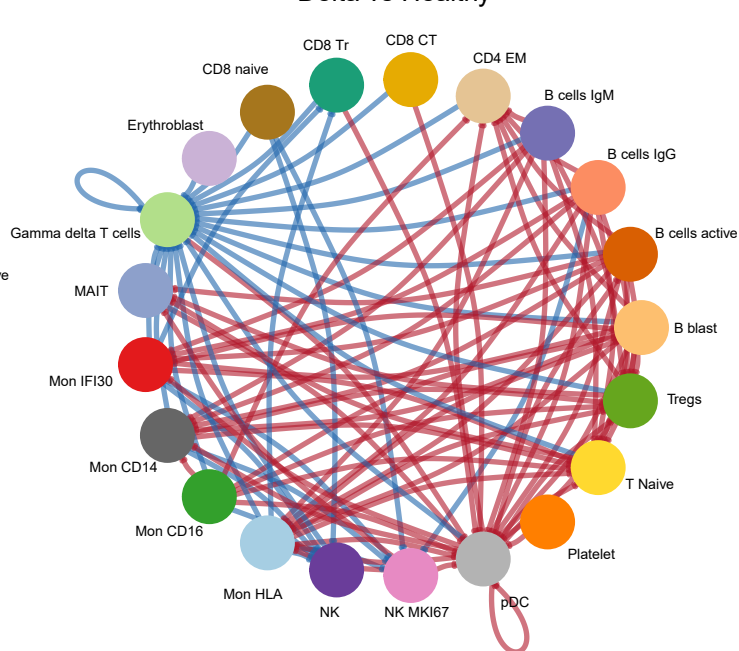

B

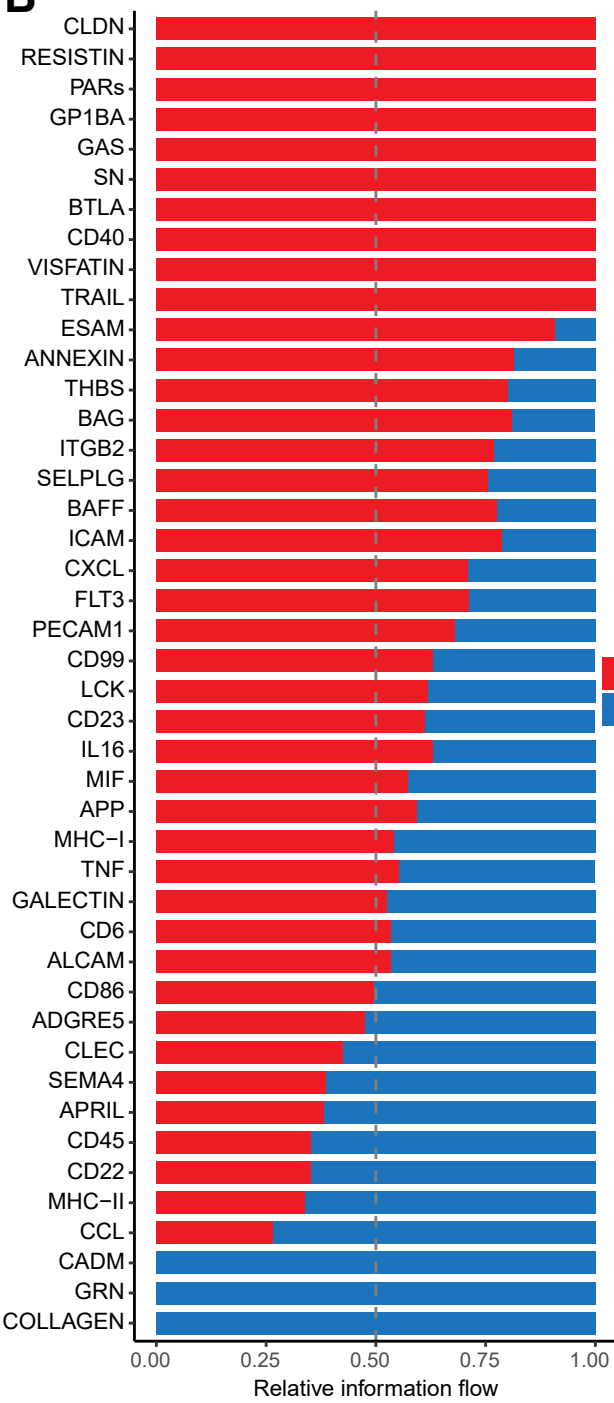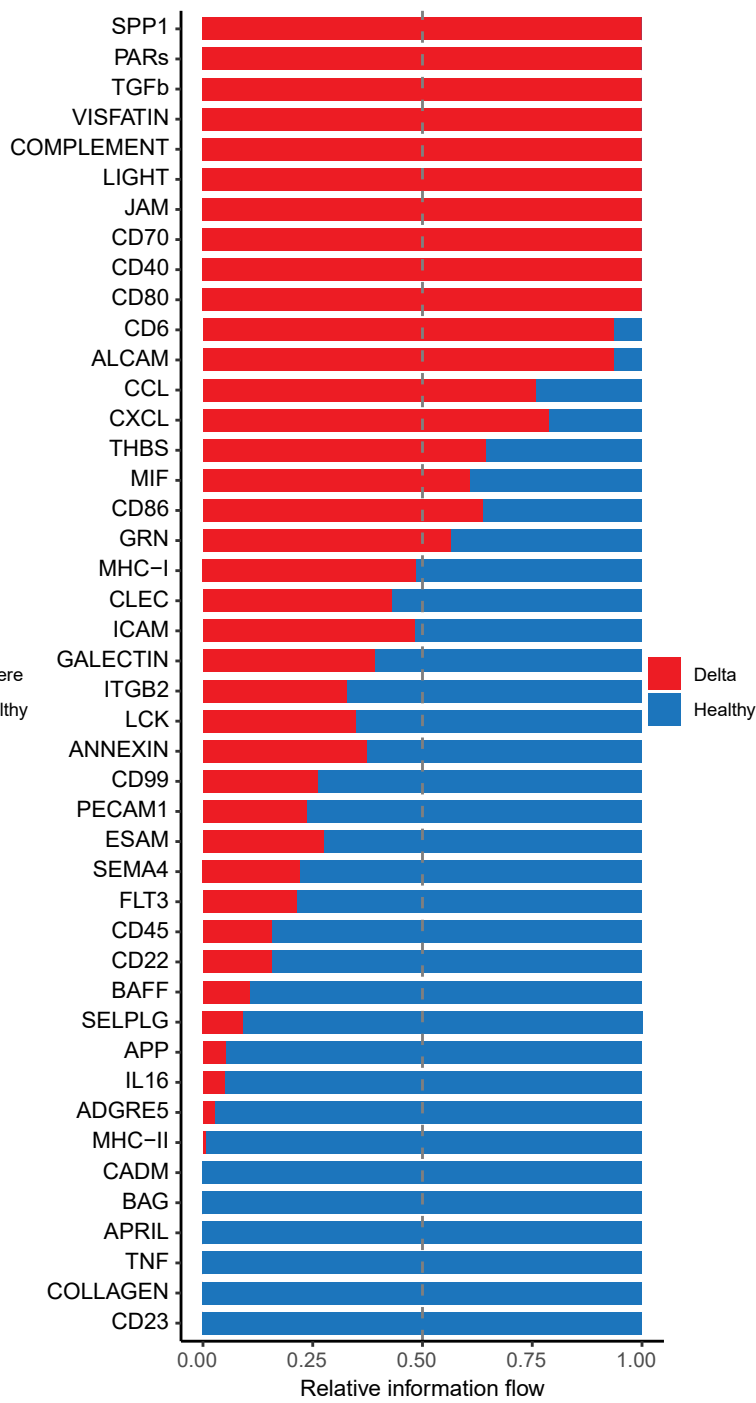

Supplement: s1 [file s1]

**A**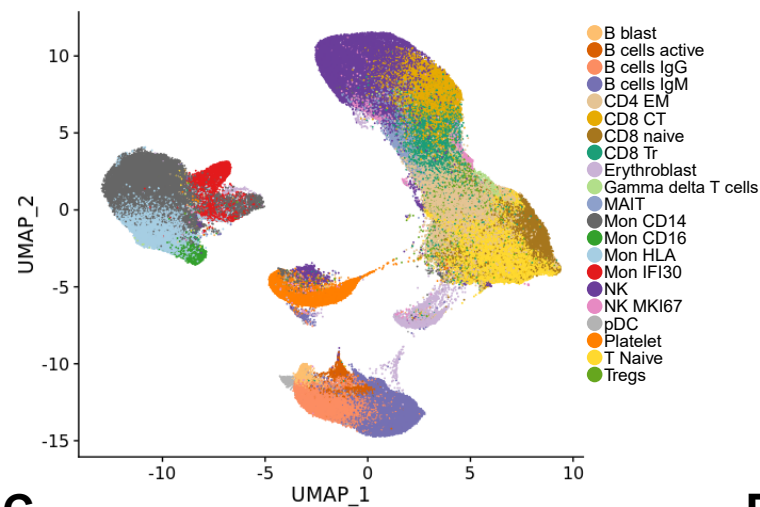**B**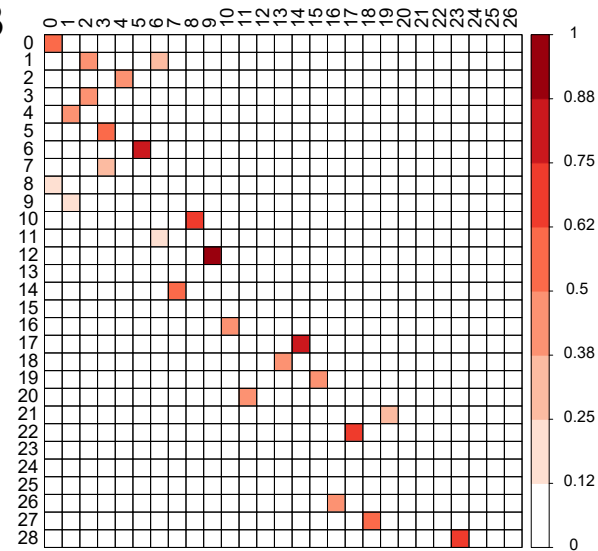**C**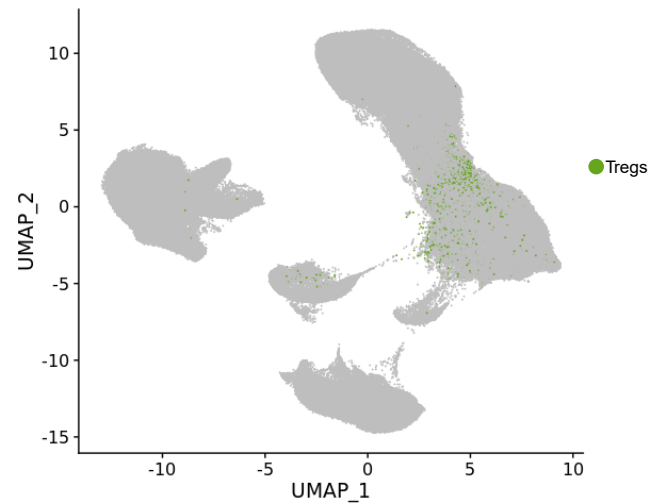**D**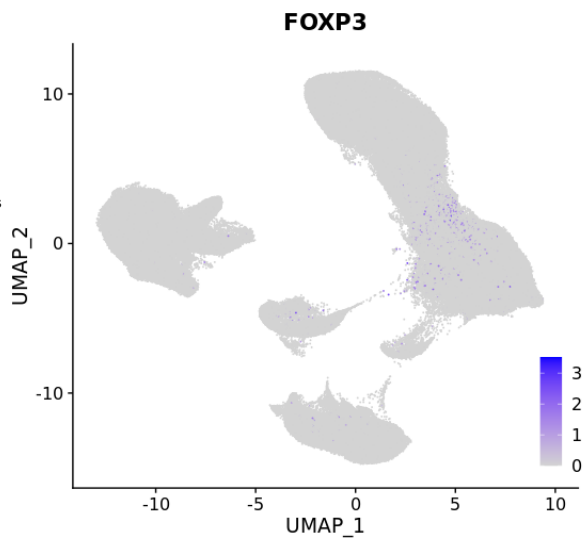

Supplement: s1 [file s1]

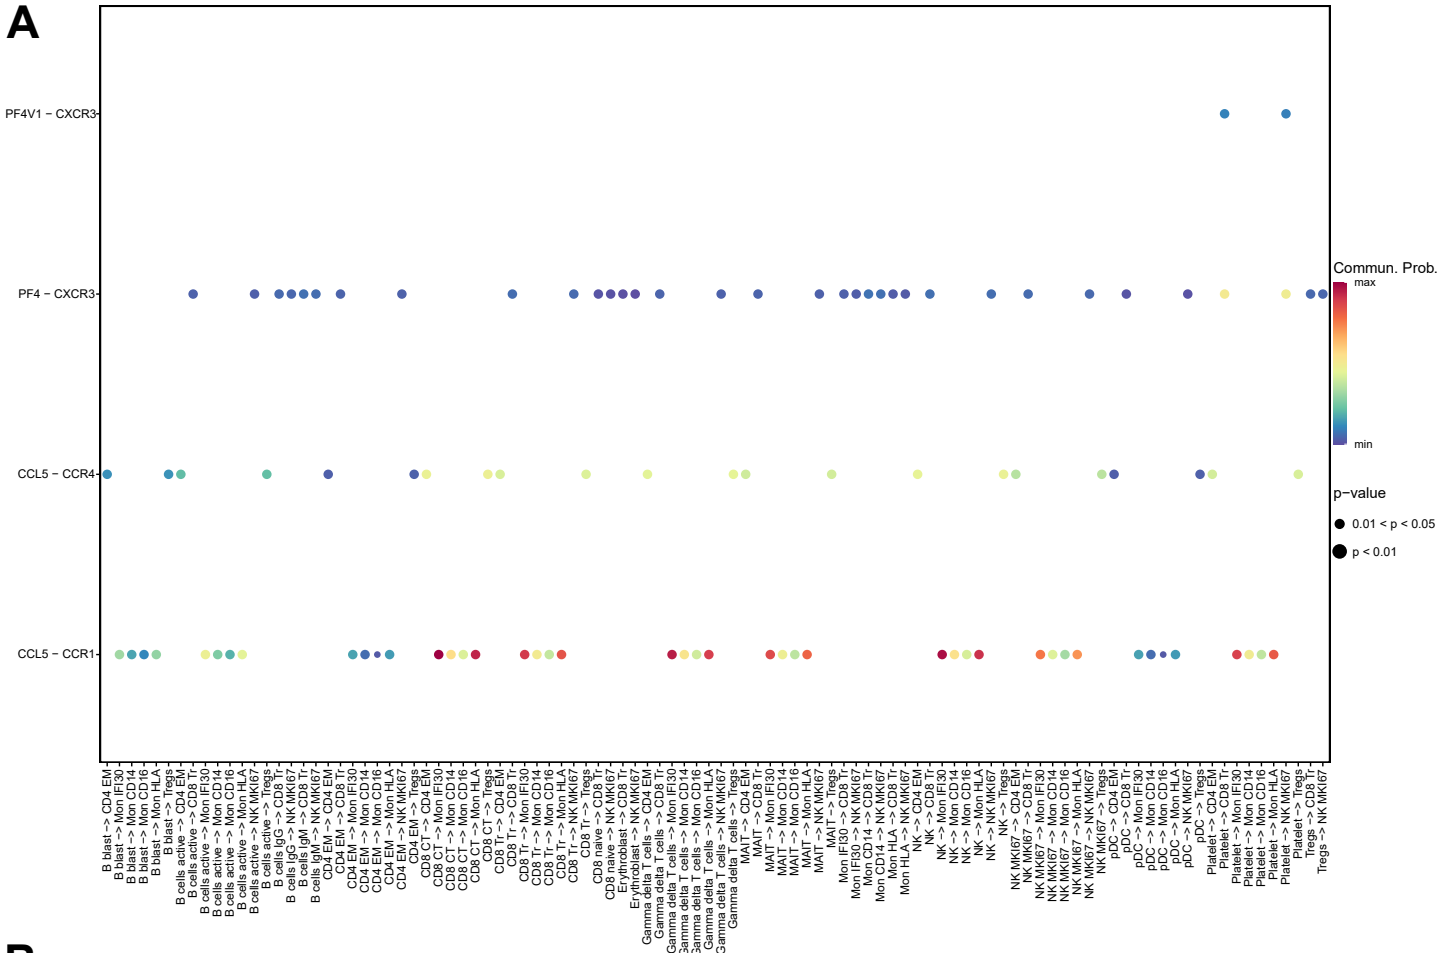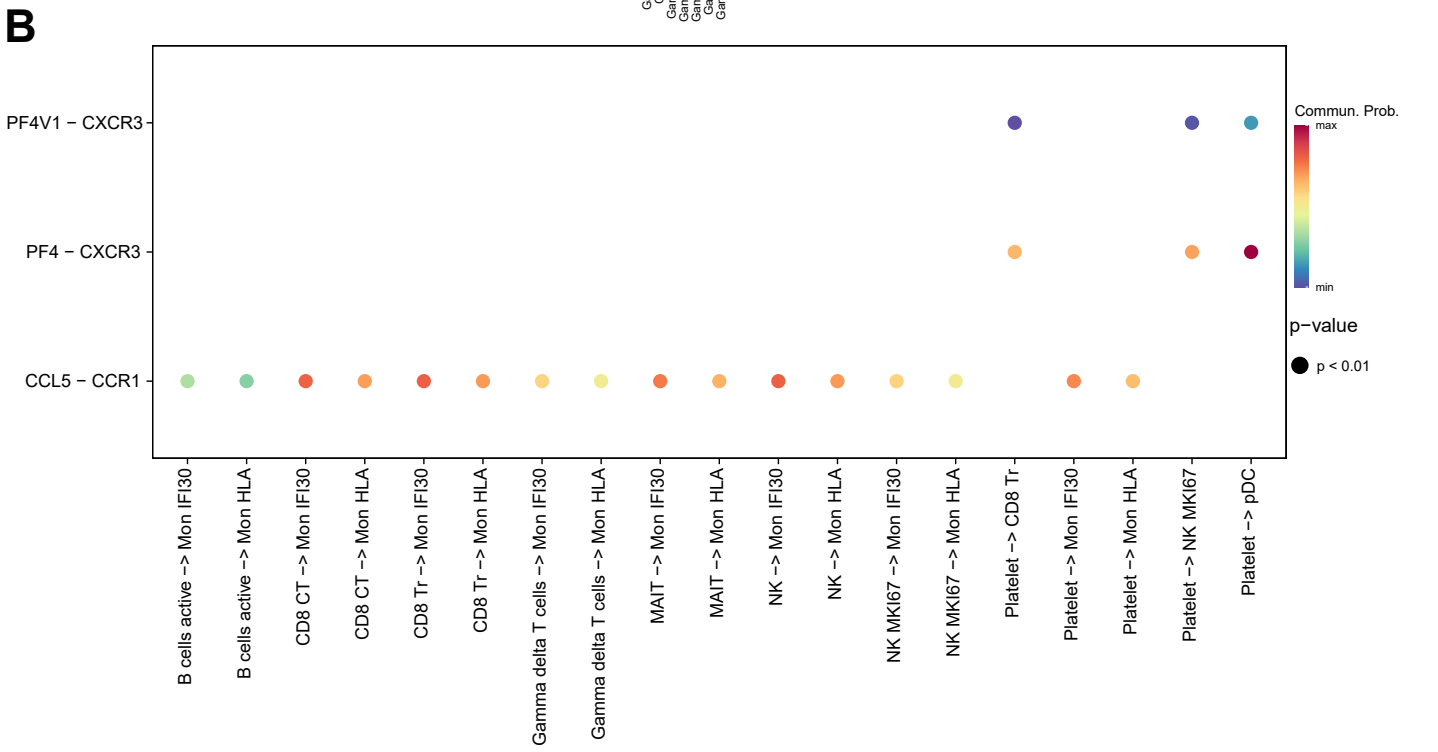

Supplement: s1 [file s1]

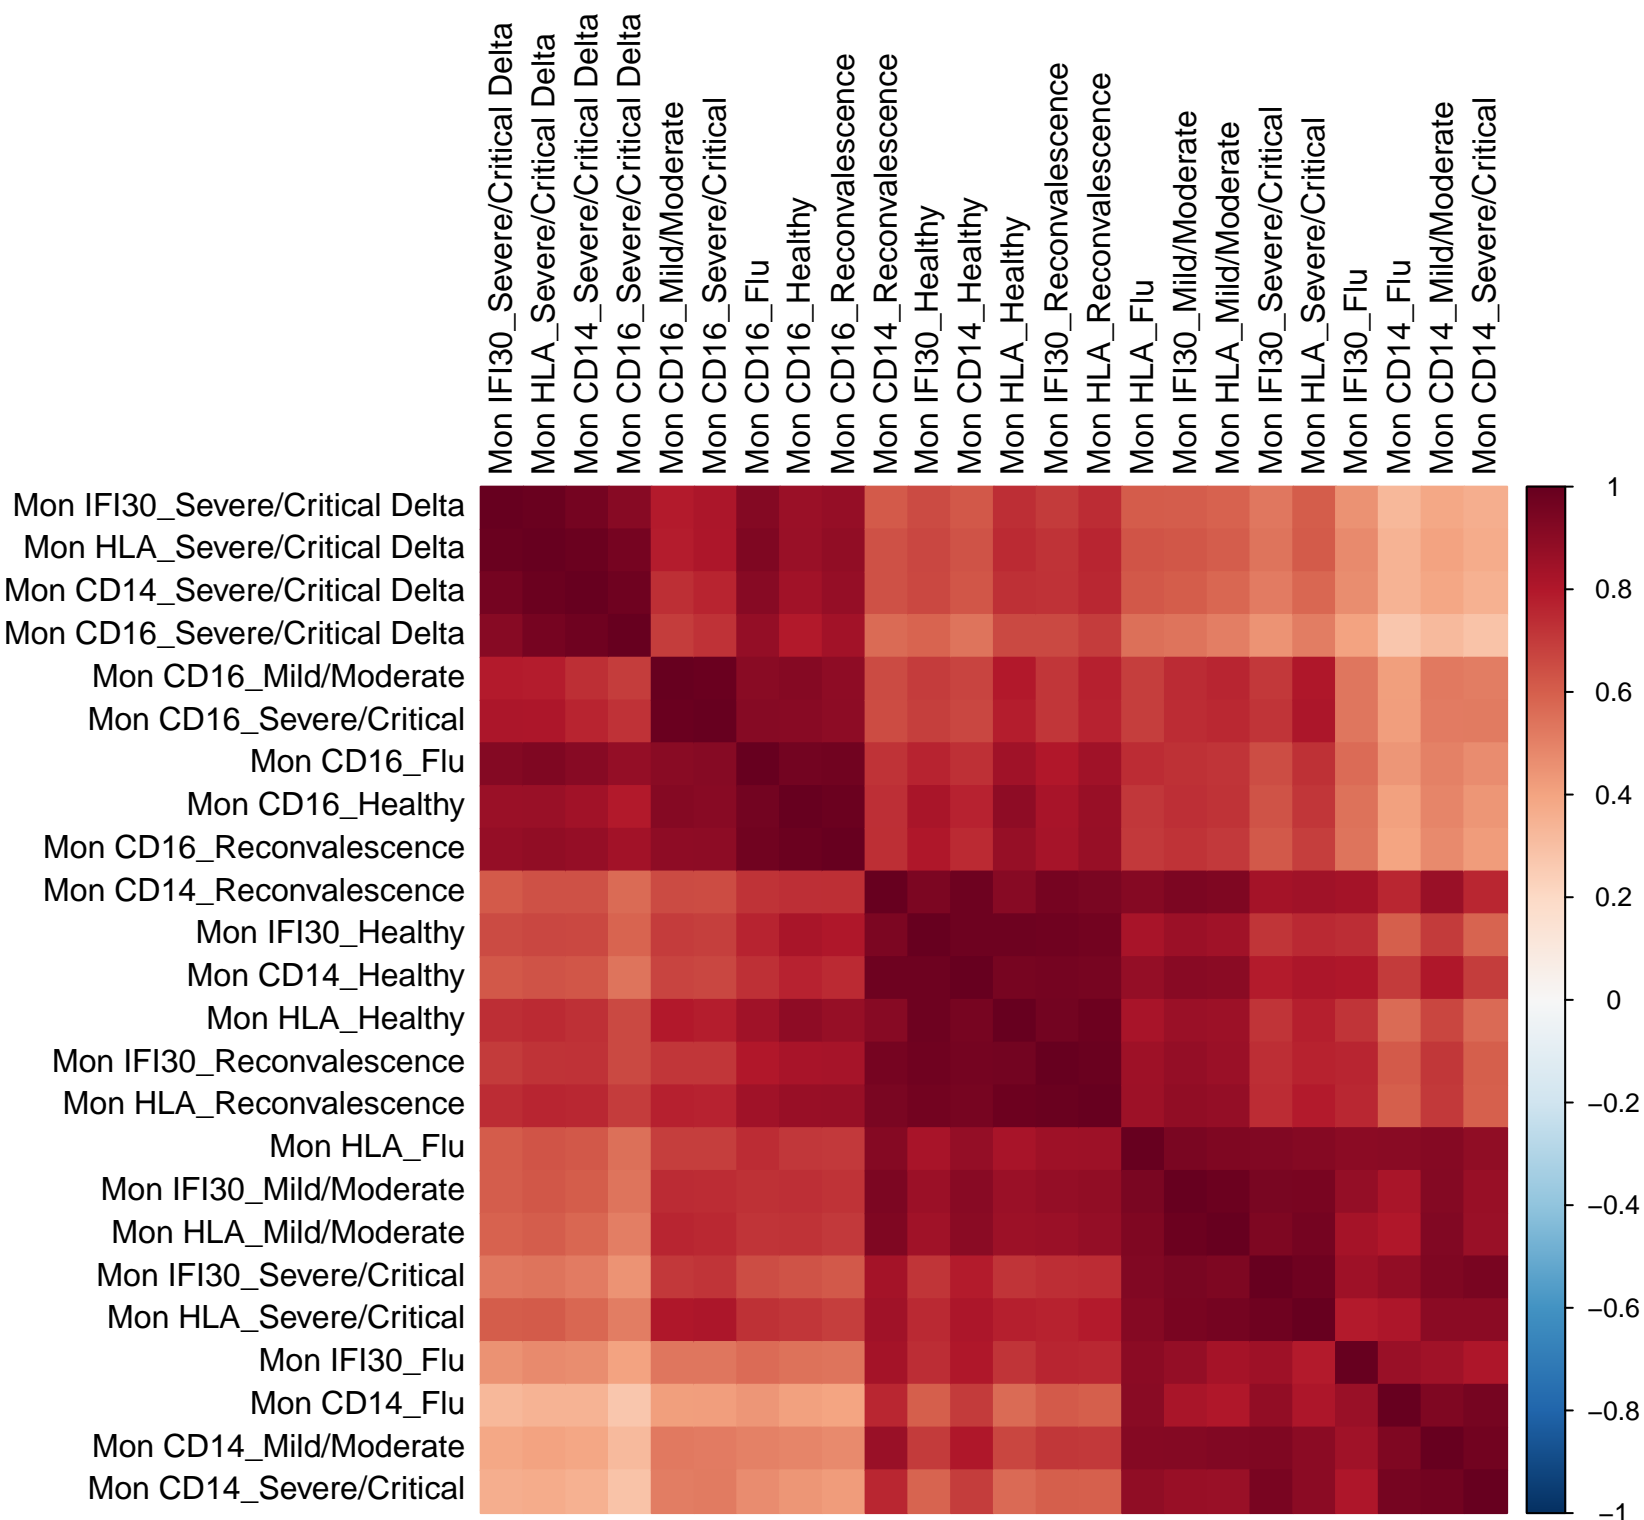

Supplement: s1 [file s1]

Split Identity

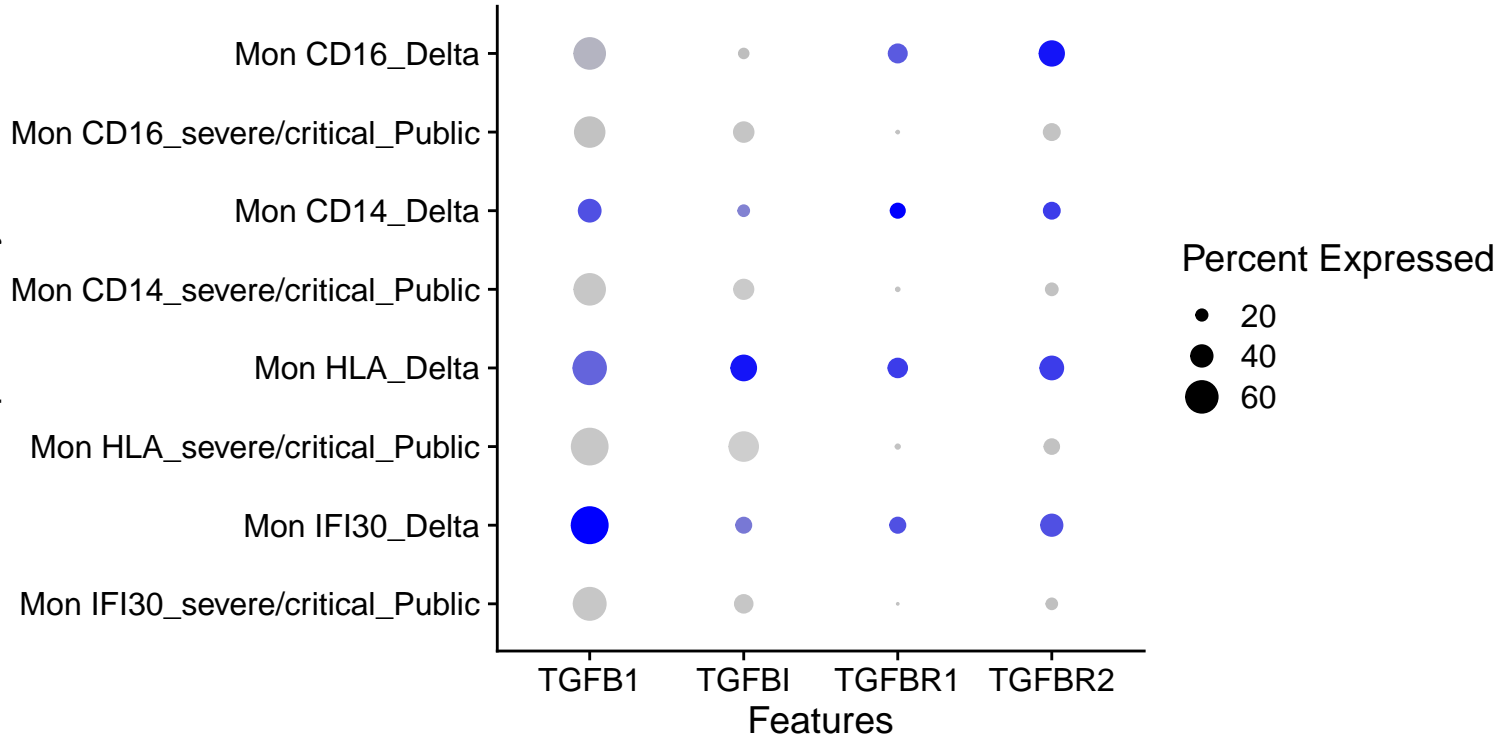

Supplement: s1 [file s1]

**A**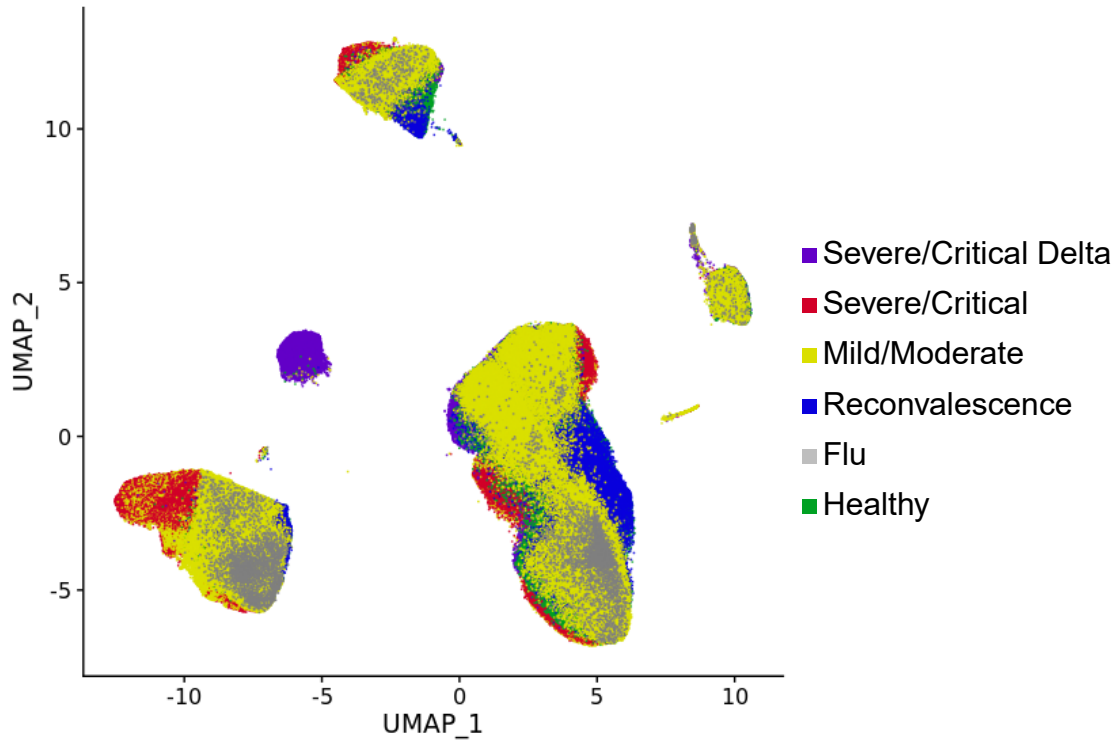**B**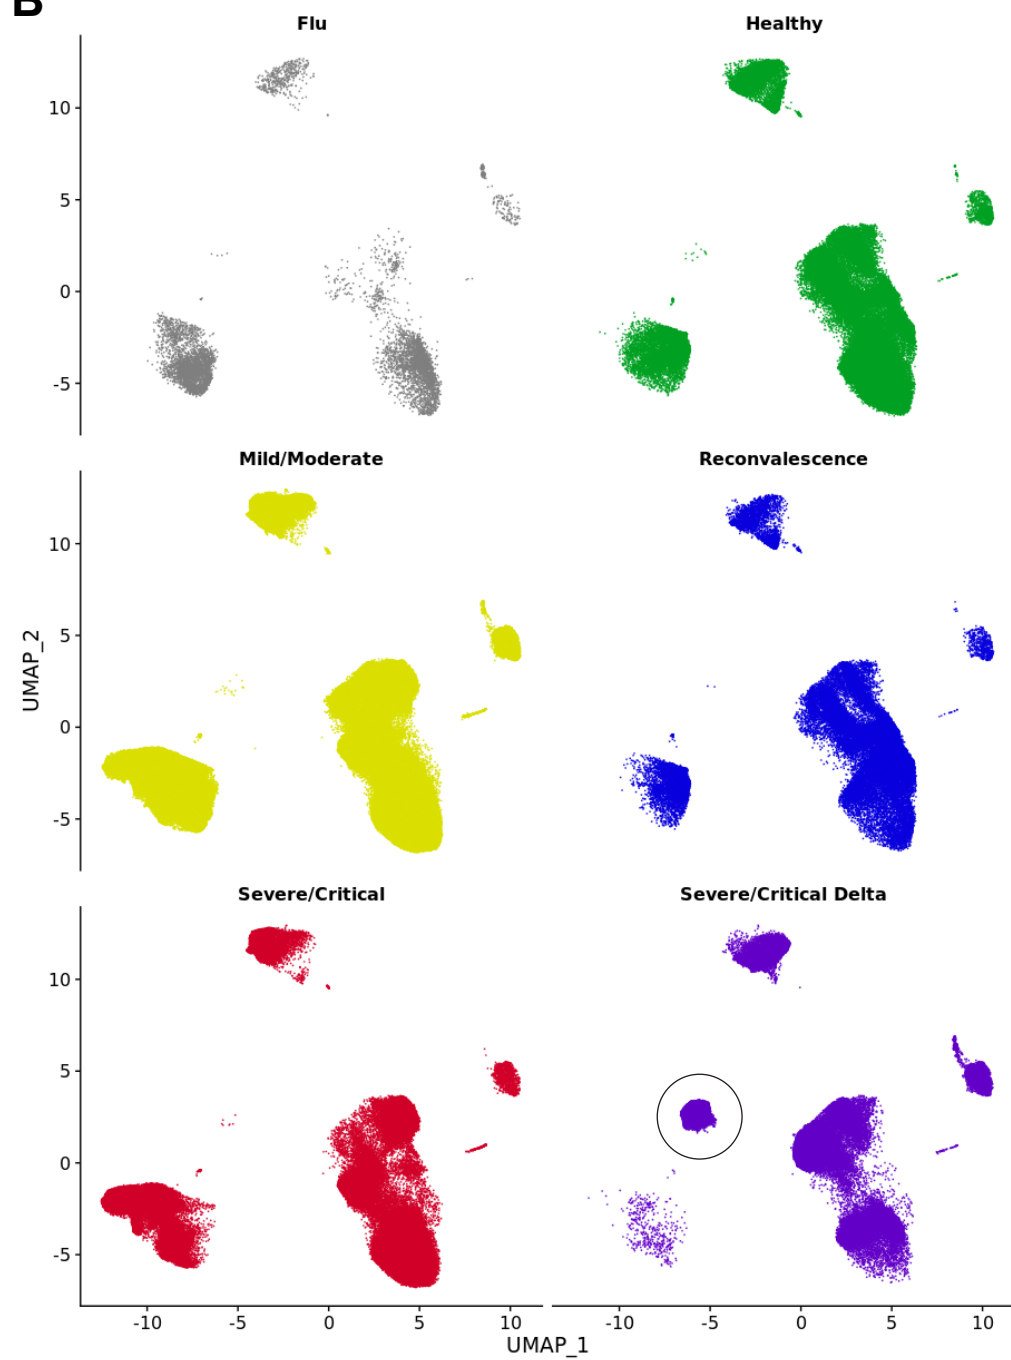

Supplement: s1 [file s1]

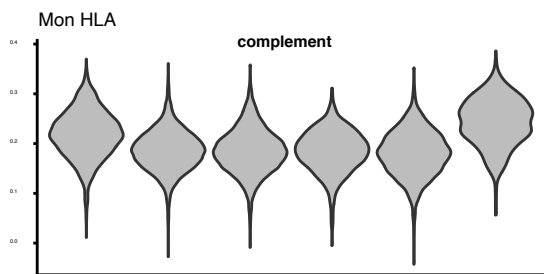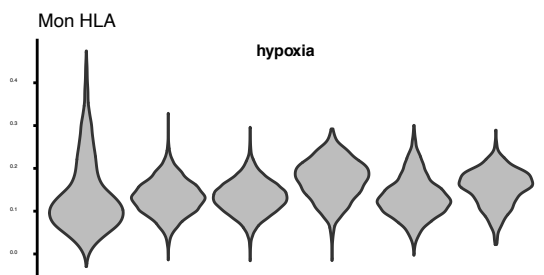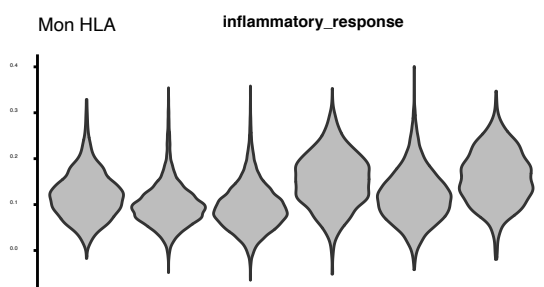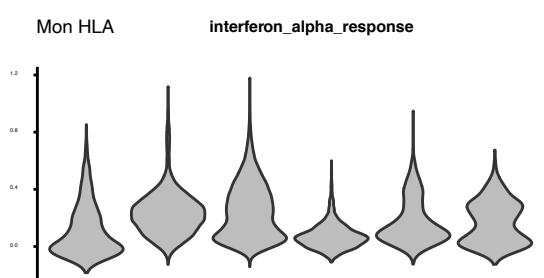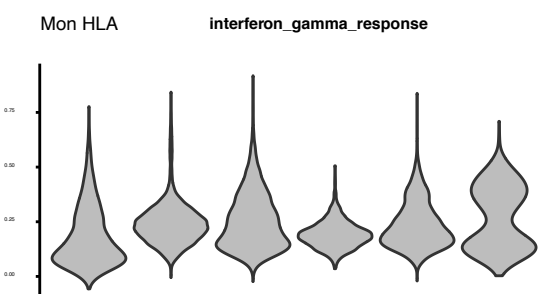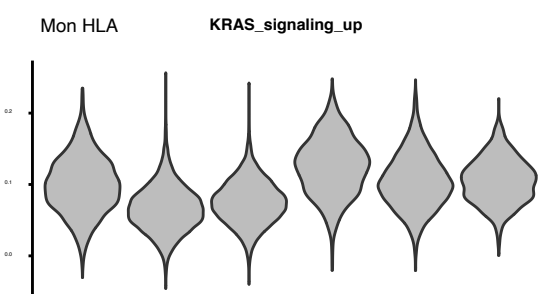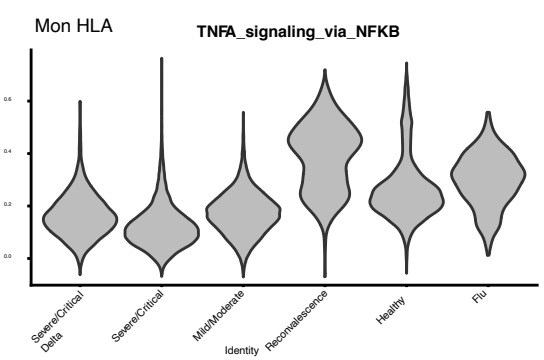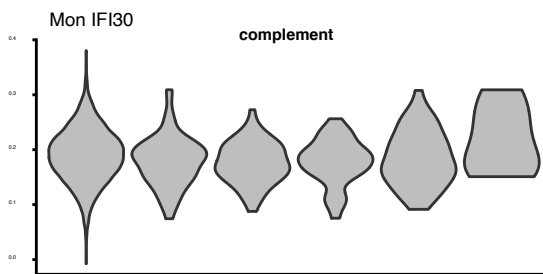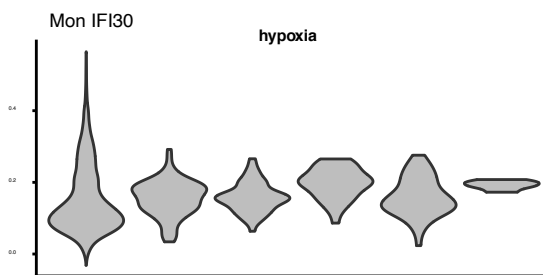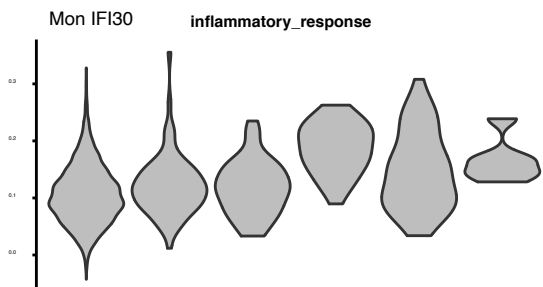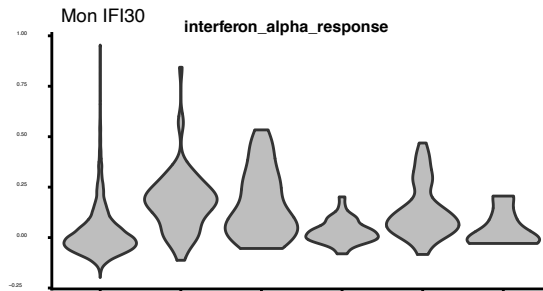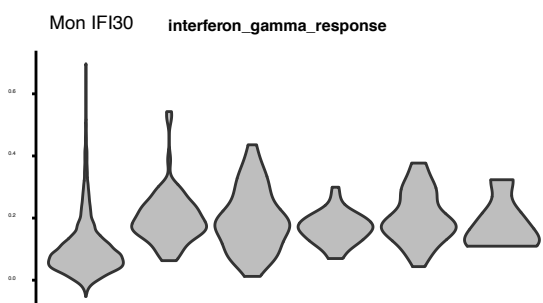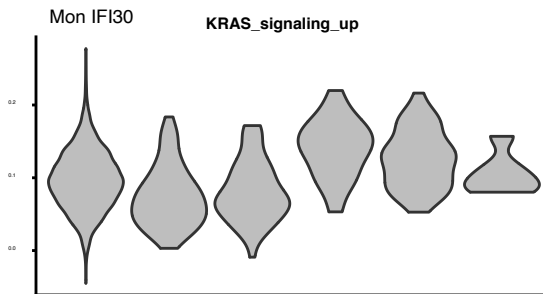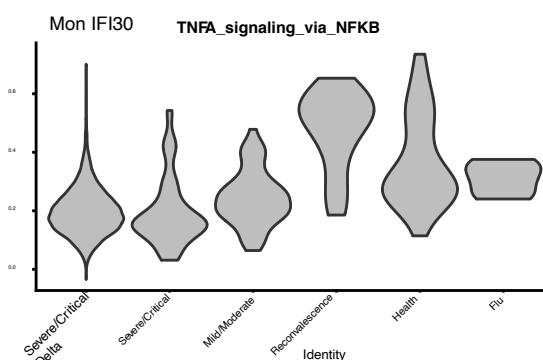

Supplement: s1 [file s1]

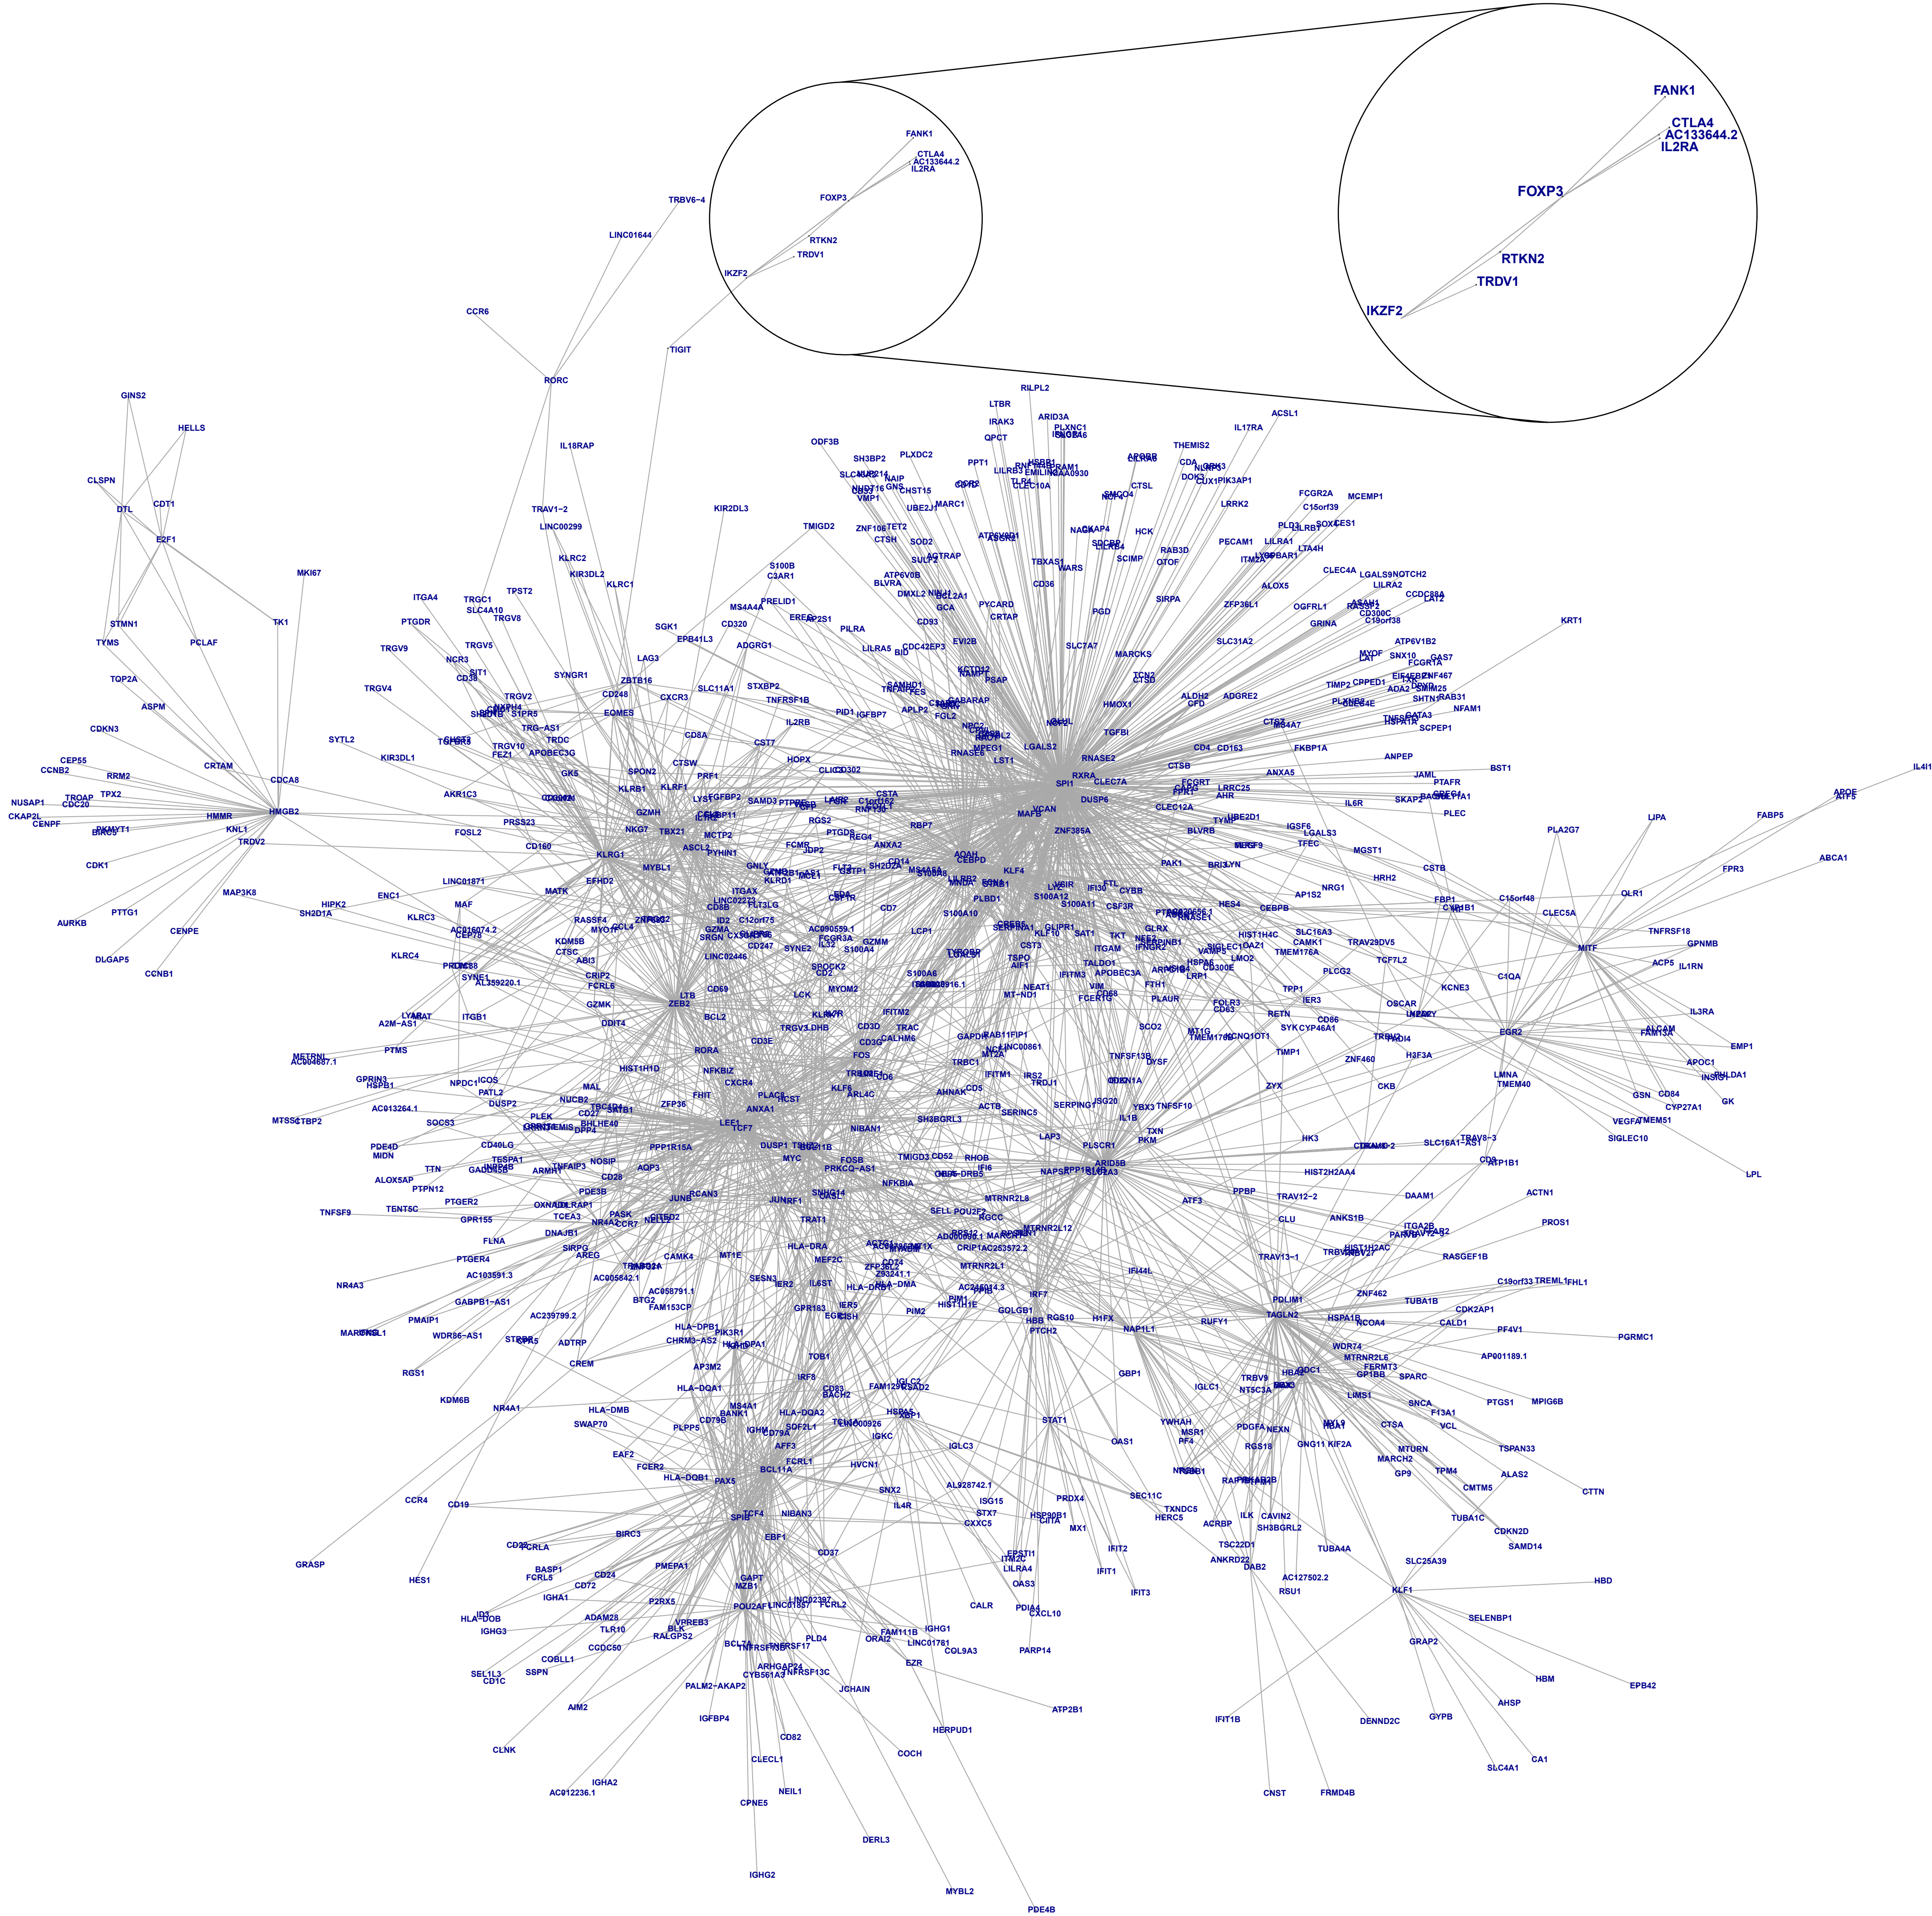

Supplement: s1 [file s1]

A

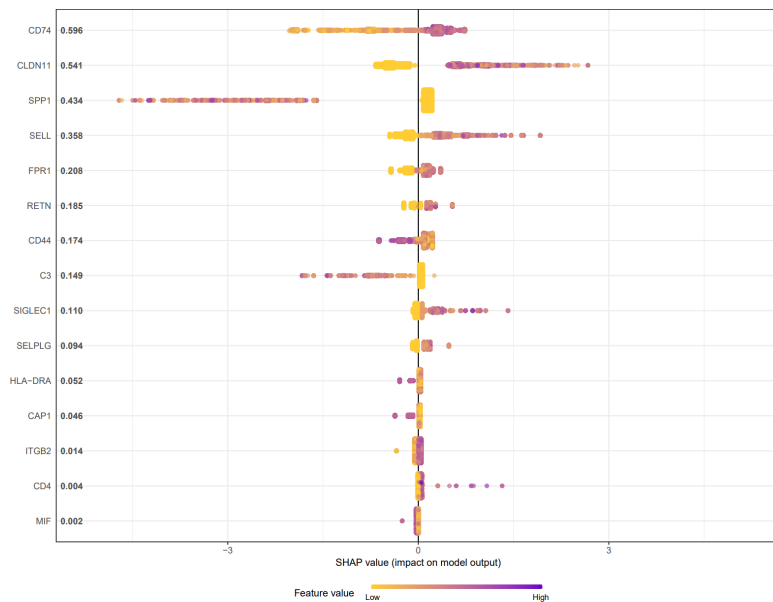

B

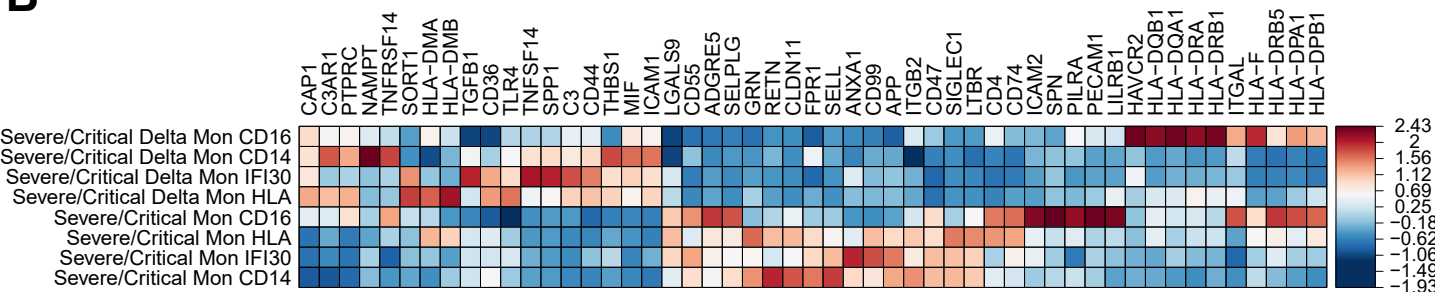

C

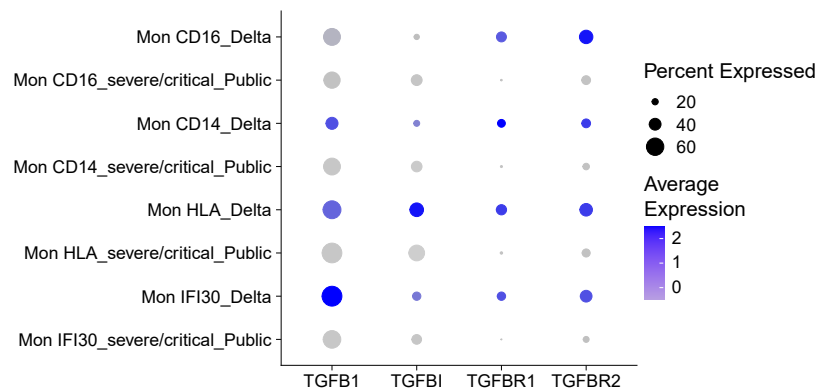

Supplement: s1 [file s1]
